# Supplementary material for: Identification and Characterization of Carboxylesterases from Brachypodium distachyon Deacetylating Trichothecene Mycotoxins
Source: MDPI journal article supplement (doi:10.3390/toxins8010006), 2015-12-25
Supplement: s1 [file s1]

# Supplementary Materials: Identification and Characterization of Carboxylesterases from *Brachypodium distachyon* Deacetylating Trichothecene Mycotoxins

Clemens Schmeitzl, Elisabeth Varga, Benedikt Warth, Karl G. Kugler, Alexandra Malachová, Herbert Michlmayr, Gerlinde Wiesenberger, Klaus F. X. Mayer, Hans-Werner Mewes, Rudolf Krska, Rainer Schuhmacher, Franz Berthiller and Gerhard Adam

**Table S1.** List of primers used for semi-quantitative expression analysis.

| Gene Locus     | Primer Name     | Sequence (5' to 3')       | Results RT-Assay            |
|----------------|-----------------|---------------------------|-----------------------------|
| Bradi3g14120.3 | BdGAPDH-frag-Fw | CAAGAACGACAAGACCCTCCTC    | constitutive                |
|                | BdGAPDH-frag-Rv | GGACATACCGGTGAGCTTGC      |                             |
| Bradi1g06240.1 | B1a-fw          | TAACAACAATTCAAGCCACTCACA  | constitutive                |
|                | B1a-rv          | TCTGCCTCGTAAGTTTTCATTGTC  |                             |
| Bradi1g06240.2 | B1b-fw          | GAGCAACGGGACTTCACCACAG    | constitutive                |
|                | B1b-rv          | CTCCTTCCAGCTCGCACAAAACC   |                             |
| Bradi1g17780.1 | B2-fw           | CGGCGGCGAGGAGAGGA         | <LOD                        |
|                | B2-rv           | CAGCGCCAGGAAGAAGTAGAAACC  |                             |
| Bradi1g19730.1 | B3-fw           | GCCGCCCTCCGCTTCCTCAC      | low constitutive expression |
|                | B3-rv           | GTAGCGCCGGCCCCAGTCCT      |                             |
| Bradi1g19750.1 | B4-fw           | TGGGCGCCGTCGTGGTGTCC      | constitutive                |
|                | B4-rv           | GTGCGCCGCGGGTGGTTC        |                             |
| Bradi1g19760.1 | B5-fw           | TCTCGCGGGGTCGTCCTGAT      | <LOD                        |
|                | B5-rv           | GCGGCCCCGGTGCTCCTGG       |                             |
| Bradi1g45930.1 | B6-fw           | GTGGCGGACATCGGCAAGGAAG    | repressed                   |
|                | B6-rv           | TTGCGGAGGAAGCTGAGGATGC    |                             |
| Bradi1g45960.1 | B7-fw           | CTCTCGGCGCACGGGACAAGT     | induced                     |
|                | B7-rv           | CACGGGCGCAGGAGATGGAACA    |                             |
| Bradi1g56830.1 | B8-fw           | GACGCCGCCGCCCTCCTCA       | <LOD                        |
|                | B8-rv           | GGTCCAGCGTGTCCCGGTTTCATCA |                             |
| Bradi1g56860.1 | B9-fw           | GGCGTCGGAGGAGGCGGAGTCT    | repressed                   |
|                | B9-rv           | CGGCGGAGGAGGCGGATGAG      |                             |
| Bradi1g56870.1 | B10-fw          | ACCGCCCACTCAACGACCGCTACT  | low expression, repressed   |
|                | B10-rv          | GCTGGCCCTCGAACTCCCTGACC   |                             |
| Bradi1g56910.1 | B11-fw          | CCCGCCGCCACGAGGAC         | <LOD                        |
|                | B11-rv          | CGCCGGCGGGGAACGAGA        |                             |
| Bradi1g67600.1 | B12-fw          | GCGCCGGCGGAATCAGG         | <LOD                        |
|                | B12-rv          | GCAGAGCGGGCCGAGACTTG      |                             |
| Bradi1g67930.1 | B13-fw          | CGCTGGCAGGCCGGTCTTCATAAT  | <LOD                        |
|                | B13-rv          | AGCGCGTCCACGAGCACCTTCTG   |                             |
| Bradi2g25470.1 | B14-fw          | GCGTGGTCGGGGGCATCC        | induced                     |
|                | B14-rv          | CGACGGCGAACTTGTTGAGGTAGA  |                             |
| Bradi2g25600.1 | B15-fw          | CACGGCCATCTACGACCACCTCTG  | constitutive                |
|                | B15-rv          | GCCGCCGCTCCGACTCC         |                             |
| Bradi2g27300.1 | B16-fw          | TTCCACGGCGGGGCTACTGC      | constitutive                |
|                | B16-rv          | CGGCGGCCTGGACGGTGAC       |                             |
| Bradi2g57920.1 | B17-fw          | TCCTGCCGCCCCGACGAG        | <LOD                        |
|                | B17-rv          | GGCGATCCACTTAAGCACCTGAC   |                             |
| Bradi3g38040.1 | B18-fw          | ACCAAGATCCGCGGCCTCGTCAT   | constitutive                |
|                | B18-rv          | CTCGCCCTCAGCCGGTCGTAGTAG  |                             |
| Bradi3g38080.1 | B19-fw          | CATCGCGTTGCTGGACCCCTACTT  | <LOD                        |
|                | B19-rv          | TCCATCTCCATCGCCGCCTTCTCT  |                             |

Table S1. Cont.

| Gene Locus     | Primer Name | Sequence (5' to 3')       | Results RT-Assay            |
|----------------|-------------|---------------------------|-----------------------------|
| Bradi3g38090.1 | B20-fw      | CGCGCTGCTCGACCCTTACTTCTG  | <LOD                        |
|                | B20-rv      | TCCATCTCCCTCGCCGCCTTCTCT  |                             |
| Bradi3g46450.1 | B21-fw      | GTCGCCCAACTACCACCGCTTCCT  | constitutive                |
|                | B21-rv      | CGCCGTGCAAACCATGACCCTCTC  |                             |
| Bradi3g46460.1 | B22-fw      | CTCCCGGCGGCTACGACGACT     | <LOD                        |
|                | B22-rv      | CTCCCTCCGCCACGCACACCAT    |                             |
| Bradi4g21690.1 | B23-fw      | CCGCTTCTCGACAACCCCAAAAA   | <LOD                        |
|                | B23-rv      | CCCCCGGCGGCAGGAACG        |                             |
| Bradi4g21700.1 | B24-fw      | CGCGCCCCCGAGCACAAGTT      | <LOD                        |
|                | B24-rv      | GTCGTAGCCGCCACCACCAG      |                             |
| Bradi4g32080.1 | B25-fw      | GCCGGCAGCCTACGACGACTCCT   | repressed                   |
|                | B25-rv      | CTGGCGCCCGGGCAAATGAC      |                             |
| Bradi4g32300.1 | B26-fw      | CCACGGCGGCGCTTTCCTCAT     | repressed                   |
|                | B26-rv      | CTCCCCCTCGATCGCCGTGCTC    |                             |
| Bradi4g32320.1 | B27-fw      | GCCGGCCGCATCTTCTTG        | low constitutive expression |
|                | B27-rv      | GCCACGCGCTTGCTTCAC        |                             |
| Bradi4g32330.1 | B28-fw      | TCCGCCGACGCCGCCTACC       | repressed                   |
|                | B28-rv      | TCGCCGTCCCACCCGCACTTC     |                             |
| Bradi4g32340.1 | B29-fw      | TCGCGACCGGGGAACCTCTC      | constitutive                |
|                | B29-rv      | CCTCTCGCCGGCCGTCTCGTA     |                             |
| Bradi4g32350.1 | B30-fw      | GGGAGCGGCGACGGAACAAAGAAG  | low constitutive expression |
|                | B30-rv      | CTCCTCCGCTCCTCGCTGGTG     |                             |
| Bradi4g32360.1 | B31-fw      | GCCAACATCGCGCACCAACC      | constitutive                |
|                | B31-rv      | TCCATCCGCTCCAGACCTCCAC    |                             |
| Bradi4g39410.1 | B32-fw      | CCACTCCAACCCCGCATTTCTCCAC | <LOD                        |
|                | B32-rv      | GGGGTACCGTTTTTGCCAGTTGC   |                             |
|                | B32-rv neu  | ACCGCTTTTCTGGCCACATAGTCA  |                             |
| Bradi5g11800.1 | B33-fw      | AGCGCCGGGGGAAACATCTG      | <LOD                        |
|                | B33-rv      | CGCGCCACCGGAGGAAGTC       |                             |

&lt;LOD below the limit of detection.

Table S2. Sequences of codon optimized genes used for heterologous expression.

| Gene Name     | Codon Optimized Sequence (5' to 3')                                                                                                                                                                                                                                                                                                                                                                                                                                                                                                                                                                                                                                                                                                                                                                                                                                                                                                                                                                                                                                                                                                                                                                                                                                                                                                                                                                                                                                                                                                                                                                                                                                                  |
|---------------|--------------------------------------------------------------------------------------------------------------------------------------------------------------------------------------------------------------------------------------------------------------------------------------------------------------------------------------------------------------------------------------------------------------------------------------------------------------------------------------------------------------------------------------------------------------------------------------------------------------------------------------------------------------------------------------------------------------------------------------------------------------------------------------------------------------------------------------------------------------------------------------------------------------------------------------------------------------------------------------------------------------------------------------------------------------------------------------------------------------------------------------------------------------------------------------------------------------------------------------------------------------------------------------------------------------------------------------------------------------------------------------------------------------------------------------------------------------------------------------------------------------------------------------------------------------------------------------------------------------------------------------------------------------------------------------|
| <i>BdCXE1</i> | ATGGCTTCTTCTCTCCACCACATGTTGTTGAAGATTGGCCACCATTCTTGCAATTATTGTCCGAT<br>GGTACTGTTATCAGAGATAGATCTGCCGAATACTCTATTTTGCCAACTCCACCACCAGGTAG<br>ACAACCAGATGTTAGATGGAAGATGTTGTTACGATGCTGCTAGAGGTTTGAAAGTTGAGAGTT<br>TACAAACCTCCTTTGTCCCATCTTCATCTGGTAACAACAAAAAGTTGCCAGTCTTGGTTTACTTT<br>CACGGTGGTGGTTATGTTATCTGCTCTTTGATTGGCCAACTTCCACTCTTGTGCTTGAGATTG<br>GCTGGTGAATTGCCAGCTTTGGTTTTTCTGCTGATTATAGATTGGCCCCAGAACATAGATTACC<br>AGCTGCTTTTCATGATGCTGCTTCAGTTTGTCTTGGGTTAGAGCACAAGCTACTGCTACTGGTAC<br>TGAAAAATGCTGATCCATGGTTGGCTGATTACAGCTGATTTTTCTAGAGTTTTCGTTTCCGGTGATTC<br>TGCCGGTGGTGGTATAGTTAATCAAGTTGCTTTAAGATTGGGTTCCGGTCAATTGGATTGGGTC<br>CATTGAGAGTTGCTGGTCATGTTATGTTGTTCCATTATTCGGTGGTGAACAAAGAACTGCTTCTG<br>AAGCTGAATATCCACCAGGTCCACATTTGTCTTTGCCAGTTTGGATAAGGGTTGGAGATTAGCT<br>TTACCAGTTGGTGCTACTAGAGATCATCCATTGGCTAATCCATTGGGTCCAGGTTCTCCAGCTTT<br>AGAATTGGTTGCTGGTGCTTTACCACCATTATTGGTTGTTGTTGGTGGTTGGATTGTTGAGAGA<br>TAGAGCTGTTGATTACGCTGCTAGATTGGAAGCTATGGGTCATGCTGTTGAATTGGTAGAATTG<br>AAGGTCAACATCATGTTTCTCGCTGTTGAACCAGGTTAGATTCTCATCTCCAGGTGGTTTTT<br>TGTCCTTGATCAACAACAATTCTCCCATCTCAAGCTGTTTCTAATGGTACTTCTCCACAACCTA<br>TTAACATTGCCAATGATACCAATGGTGGTGACTCTGCTAGAACAGGTAAAAGATTGCAATGGAC<br>CAAAGAAGAAGATTGCAGATTGATTTCTGCCTGGTTGAACAATTCCAACGATCCAATTCAATCC<br>AACTACAAGAAGAACGACCAATACTGGAAGGATGTCGTTGCTGTTATTCTTCTACTACCCAA<br>AAGATAGAGCCAGATTGGTTAAGCAAGTTAAGGATAGATTCCGTTAGAAATCAAGAAAAGAGTTG<br>CTTGGTTTTGCGCCTCTTGGAAGAAGCTAACGCCTGTACGCTTCTGGTGAATCTGATGTTGATT<br>TGAGAGAAAAGAACCATGAAGACCTATGAAGCCGATCACAAGAAGATGGTCCATTCTATG<br>AACATTGCTGGGAATTCTTGAAAAAAGAACCTAAGTGGGATGCCTATTTGGAAGATTAGAAG<br>ATTTGGAACCTAGAAGAGAATCTCCGCTTTATGATGAAGTGGGGTTCCATTCTCATCTGA |

Table S2. Cont.

| Gene Name      | Codon Optimized Sequence (5' to 3')                                                                                                                                                                                                                                                                                                                                                                                                                                                                                                                                                                                                                                                                                                                                                                                                                                                                                                                                                                                                                                                                                                                          |
|----------------|--------------------------------------------------------------------------------------------------------------------------------------------------------------------------------------------------------------------------------------------------------------------------------------------------------------------------------------------------------------------------------------------------------------------------------------------------------------------------------------------------------------------------------------------------------------------------------------------------------------------------------------------------------------------------------------------------------------------------------------------------------------------------------------------------------------------------------------------------------------------------------------------------------------------------------------------------------------------------------------------------------------------------------------------------------------------------------------------------------------------------------------------------------------|
| <i>BdCXE13</i> | ATGGCTTCTTCTGATGCTGGTGTCTGGTGTCTGTGAAGCTGTAAAAATTGAATTGTTGCCTTTC<br>ATTAGGGTTTACAGGTCTGGTAGGGTCGAGAGATTGTTGGGTACTGCAACAGTCCCAGCTTCTTT<br>GGATGCTGCAACAGGTGTCTGCTAGCAGGGACGTCGCTATTGACCCAGCTACTGGTGTCTCTGTC<br>AGGTTGTACTTGGCACCGGCGGCGACTTCTTCAGGTAGGGGAGGTAACAACAAGTTGCCAGTCT<br>TAGTTTATTTCCATGGAGGTGGTTTCATGGTCGAGTCTGCTGCATCTCCAACCTTACCATAGATATT<br>TAAATGCTTTGGCTTCAAGAGCAGGTGTCTTGGCTGTCTCAGTTGAGTACAGAAGGGCTCCTGAA<br>CACCCATTGCCGGCGGCGTATGACGACTCTTGGGCTGCTTTGGCTTGGGCTGTCTGCTGGTTGTGA<br>ATCTTACTCATCTAATCCATGGTTGTCTGCTCATGGTGACAAGTCAAGGGTCTTCTTGGCAGGTG<br>ACTCTGCTGGTGCTAACATTGCACATAACGTCGCTGCAAGAGTCGCAGCTCAAGGTTTGCCTACT<br>CCAGGTGCTGCTGCTATAGTCGGAGTCTTGTGGTCCACCCTTACTTCTGGGACGCTTCTAACGCT<br>ATGGGTCCAGAATTGGAAACTAGAAATTAGAGGTGAATGGAGATTCACATGGGCTAGGCCAGAA<br>GCTCAAGTTGACGACCCAAGGTTGTGCCAACTTGCGCTCCAGGTGCTGCACCAAGATTGGCTG<br>CATTGCCATGCGAAAGGGTTATGGTCGCAGTTGCAGGTGAGGACTTCTTGGCTGCTAAGGGTAG<br>GGCTTACTACGCTGCTTGTGGCTTCAGGTGAGAGGTGAGGCTGAATTGGTCGATATCCAG<br>GTCAAGGTCACGTCTTCCACTTGTGAGACCTTGGACTGAGGCTGCTGCTGAAATGTTGGACAGA<br>GTTGCTGCTTTCATTGATAGGGCTTAA                                                                |
| <i>BdCXE27</i> | ATGGCTCCAGCTACTGAAACTCAACAACATAGAGCTACTTCTACTGGTAGAAGAAAGGTTGTG<br>ATGAAGTTTCTGGTTGGTTGAGAGTTATGGATGATGGTACTATTGATAGAACTTGGACTGGTCCA<br>CCTGAAGCCTTGCCATTGATGCAACCAGTTGAACCATATGCTGAACCTAGAGATGGTCATACCT<br>TGCATGATTTGCCAGGTGAACCTAAATTGAGAGTTTACATTCCAGAAGCTACTGCTACAGCTAAT<br>GTTGGTTTGCCAGTTATCGTTCAATTGCATGGTGGTGGTTTCTGATTTTCTCATCCATCTTGGGTCT<br>TGTACCATCACTTTTATTCTAGATTGGCTAGAGCTTTGCCAGCTGTGTTGTTACTGCTGAATTGC<br>CATTGGCTCCAGAACATAGATTGCCAGCTCAAATTCATACTGGTGTGATGTCTTGCACAGATTG<br>AGATCTATTGCCTTGTCTATCTGATTCCTTGTACTCCAGCTGAATTGTTATTGAGAGAAGCTGCT<br>GATATGTCCAGAGTTTTTTTGGTTGGTGATTCTCAGGTGGTAATTGGTTTCATCATGTTGCTGCT<br>AGAGTTGGTGAAGATGGTCCAGATCATTGGGCTCCATTAAGAGTTGTTGGTGGTATTCCAATTCA<br>TCCAGGTTTTGTAGAGCTGCCAGATCTAAATCTGAATTAGAACCCTAGACCAGACTCCGTTTTCT<br>TCACTTTGGATATGTTGGATAAGTTCTTGGCTATGGCTTTACCAGAAGGTGCTACAAAAGATCAT<br>CCTTACACTTGTCCAATGGGTGCTGATGCTCCACCATTGGAATCTGTTCCATTGCCACCAATGTT<br>AGTTGCTGTTGGTGAACATGATTTGATCAGAGATACCAACTTGAATACTGTGATGCTTTGAGAG<br>ATGCCGGTAAAGAAGTTGAAGTTTTGTGTCTAAGGGTATGTCCCACTCTTTCTACTTGAACAAG<br>TTTGCTGTTGAAATGGACCCAGAACTGGTGAAAGAACCAAGAATTGATTGACGCCATTCTA<br>GATTCGTTGCCAGACATTGA |
| <i>BdCXE29</i> | ATGTCCTCTTACACTGCTCCACAAGCTCAAGCTCATGTTGTTGAAGATTTTTTCGGTGTCTGCCAA<br>TTGAGATCTGATGGTTCTGTTATTAGAGGTGACGAATCTGTTTTGTTCCCAACAGAACATATCCT<br>GAAGTTCCAGGTGTTGAATGGAAGGATGTTGTTTATCATGCTGCTCATGGTTTGAAGGCTAGAGT<br>TTACAGACCATCTTCTCCAGTTGCTGCTGAAAAAGAAGAAAAGAAGTTGCCAGTTTTGGTCTACT<br>TTCATGGTGGTGGTTACTGTTGGGTTCTTATGCTCAACCATCTTCCATGTTTTCTGTTTGAGAGC<br>TGCTGCAGAATTGCCAGCTGTGTTTTGTCTGTTCAATATAGATTGGCCCCAGAACATAGATTAC<br>CAGCTGCTATTCATGATGGTGAAGGTTTTTGTCTTGGTTGAGAGCACAAGCTGAAACTAGAAAT<br>GCTGATCCATGGTTGGCTGATTCTGCTGATTTTGCTAGAACTTTCGTTTCTGGTTGTTCTGCTGGTG<br>CTAATTTGGCTCATCATGTTACTGTTCAAGCTGCTGCTTCTCCGGTATTATTGATTCTTACCAGT<br>TCCATTGAGAATCGCTGGTTTTGTTTTGTGCTGCATTCTTCTCAGGTGTTCAAAGAAGTCCAGC<br>TGAAATTGATTTGTCACCAGCTGATGTTTCTTGACTGCTGATATGGCTGATCAATTGTGGAGAA<br>TGGCTTTGCCAGCCGGTGCTACTAGAGATCATCCATTGGCTAATCCATTGGTCCAGAACTGAA<br>TCCTCTGGTTTTATTGCTGCTGTTGAATTACCACCTGTTTGGTTGTGCTCCAGGTATTGATGTTT<br>TGAGAGATAGAGTTTTGGGTTACGCTGCTGCTATGAGAGAATTGGGTAAAGATGTTGAATTGGC<br>CAGATTGCAAGGTGAACAACATGGTTTTCTGTTTCTAGACCATTCTGATGCTGCTGACGAAA<br>TGATGAGATTATTGAGAAGATTCGCTACCAACCTAGATAA                                                 |

Table S2. *Cont.*

| Gene Name      | Codon Optimized Sequence (5' to 3')                                                                                                                                                                                                                                                                                                                                                                                                                                                                                                                                                                                                                                                                                                                                                                                                                                                                                                                                                                                                                                 |
|----------------|---------------------------------------------------------------------------------------------------------------------------------------------------------------------------------------------------------------------------------------------------------------------------------------------------------------------------------------------------------------------------------------------------------------------------------------------------------------------------------------------------------------------------------------------------------------------------------------------------------------------------------------------------------------------------------------------------------------------------------------------------------------------------------------------------------------------------------------------------------------------------------------------------------------------------------------------------------------------------------------------------------------------------------------------------------------------|
| <i>BdCXE32</i> | ATGGCTGCTGCTCCAATGGCTCCACCACCACCAGCTGCTGATGACGAAATAGTTTATGAATCTA<br>TGCCATGCATCAGAATCTACAAGAACAGAGTCGAAAGATACTTCGGTTCGGAATTCATTGCTGC<br>TTCTACTGATGCTGCTACTGGTGTGTTTCTAGAGATAGAACTATTTCCCCAGAAGTTTCCGCCA<br>GATTATACTTGCCAAGATTGGATGCTGATGCTCCAGCTGCTAAATTGCCAGTTTGGTGTATTATC<br>ACGGTGGTGGTTTTTGTTGGGTCTGCTTTTAATCCAACCTTCCATGCCTACTTCAATTCITTTGC<br>TGCTTTGGCTAACGTTGTGTTGTCTCTGTTGAATATAGATTGGCTCCAGAACATCCAGTTCAGC<br>TGCATATGCTGATTCTTGGGAAGCCTTGGCTTGGGTGTTTCTCATGCTGCTGGTCTGCTGGTGA<br>TGAACCTTGGTGTCTGATCATGCTGATTTCTCTAGATTATACTTAGGTGGTGAATCTGCTGGTGC<br>TAATTGGCTCATCATATGGCTATGAGAGTTGGTGTGAAGGTTAGCTCATGATACCAAAATTA<br>GAGGTTTGGTCATGATCCACCCATATTTCTTGGGTCTAACAAGGTTGATTCCGATGATTGGAC<br>CCAGCTACTAGAGAATCTTTAGGTTCTTTGTGGTCTGTTATGTGTCCAACCTACTACTGGTGAAGA<br>TGATCCATTGATTAACCCATTTGTTGAAGGTGCTCCAGATTGGAAGCCTTAGCATGTGGTAGAG<br>TTTTAGTTTGTGTTGCCTTGGGTGATGTTTGAGAGACAGAGGTAGAACTACTACGATAGATTG<br>AGAGCTTCTGGTTGGAGAGGTGAAGCTGAAATTTGGCAAGTTCACGGTAAAGGTCATACTTTCC<br>ACTTGTGGAAACCATGTTGTGATGAAGCTGTTGCTCAAGATAAGGTTATCTCCGATTTCTGAAC<br>AGATAA |
| <i>BdCXE46</i> | ATGGATTCTGGTTCACCGAAGTTTTGGTTGATGCTGGTTCITTCAGATTATACAACGATGGTCA<br>CGTTGAAAGATTGGATGGTGTGATCATGTTCCAGCTGGTTTTGATGCTGATACTGGTGTACTTC<br>TAAGGATGTTGTTATTGATGCCGTTACAGGTGTTGCTGCTAGATTATACTTGCCAGATATTCAAG<br>CTGCTGCTGGTAGATCTGATGGTACTGCTATTACAAAATTGCCAATCGTCGTTTTCTTCCACGGT<br>GGTACTTTATCGTTGGTCTGCTGGTTCACCAAGATACCATAGATACGTTAATTTCTTGGCTGCT<br>AGAGCAAGAGCTATTGCTGTTTCTGTTGATTATAGATTGGCTCCAGAACATCCATTGCCAGCTGC<br>TTATGATGATTCTTGGTTGACTTTGAATTGGGCTGCTTCTGGTTCAGCTGATCCATGGTTGTCTGA<br>ACATGGTGATTGGGTAGAGTTTTTTGGCTGGTTGTCTGCTGGTGGTAATATTGCTCATAACAT<br>GGCTATTGATGCAGGTTTGACTGGTTTGAGAGCACCAGCTAGAATTGAAGGTGCTATTTTGTGTC<br>ATCCATCTTTCTGTGGTGAACAAAGAATGGAAGCAGAAAGCTGAAGAACATTGGGCTTCAGTTAA<br>GAAAAGATGGGCTGTTATTTGTCCAGGTGCTAGAGGTGGTTTGGATGATCCAAGAATGAATCCA<br>ACAGCTGCTGGTGCCCCATCTTAGCTGCTTTGGCTGTGAAAGAATGTTAGTTACTGCTGCATC<br>TGAAGATCCTAGAATGCCAAGAGATAGAGCTTATTACGAAGCCGTTGTTTCTTCTGGTTGGGGT<br>GGTTCTGTTGAATGGTTTGTCTGAAGGTGAAGTCATGGTTTCTTCATTGATGAACCAGGTGG<br>TAGTGAAGCTGCCGCTTTGA                                                     |
| <i>BdCXE49</i> | ATGGACCCAGTTCCAAAGTTGAGATTCTGATTCTCCATTATTGAGAGTCTACGAAGATGGTTGCGT<br>TGAAAGATTTTTGGTACTGATACAACCTCCACCAGGTTTTGATGCTGCTACTGGTGTACTTCTAA<br>GGATGTTGTTATTGATGGTGCCACAGGTGTTTTTGCCAGATTGTATATTCCAGACATTTGCGGTTT<br>TGGTTCCCAATCTTCTAAATTGCCAATCTTGTTGTACTTCCATGGTGGTGGTTTGGTTTTGGATTCT<br>GCTGCTTCTCCAGCTTATCATAGATACTTGAACCTCCGTTGTTTCTAAGGCTGGTGTTTTGGCTATG<br>TCTGTTAATTACAGATTGGCTCCAGAACATCCAGTTCAGCTGCTTATGATGATTCTTGGATGGC<br>TTTGGGTTGGGCTGCTTCTAGAGAAGATCCATGGTTGTCTGAACATGGTGATGCTGGTAGAATTT<br>TCTTGGCTGGTGATTCTGGTGGTGCTAATATCGTTCATAACATTGCTATTATGGCCTGCACTAGA<br>GAATATGGTTTGCCACCAGGTACTGTTTGAAGGTGCTATTATCTTGCATCCAATGTTCCGGTGG<br>TAAAGAACCAGTTGAAGGTGAAGCTACTGAAGGTAGAGAATTTGGTGAAAAGTTGTGGTTGTTG<br>ATCATTTGCCCTGAAGGTACAGAAGGTGCTGACCATCCAAGATTGAATCCAATGGCTCATGGTG<br>CTCCATCATTGCAAAAATTGGCTGTAGAAAAGTTGTTGGTTTGGTCCGCTGAAAGAGATTTTGCT<br>AGACCAAGAGCTGCTGCTTATTATCAAGCTGTTAAGGCTTCTGCTTGGAGAGGTTCTGTTGAATG<br>GTTGGAAATCTAAAGGTGAAGAACACGTATTTTCTTGAACAAGCCAGAATCCGGTGAATCTTTG<br>GCTTGTATGGATAGAGTTGTTGCTTTTTTGGGTGGTAAGTAA                   |

Table S2. Cont.

| Gene Name      | Codon Optimized Sequence (5' to 3')                                                                                                                                                                                                                                                                                                                                                                                                                                                                                                                                                                                                                                                                                                                                                                                                                                                                                                                                                                                                                                                                                                                                                                                                                  |
|----------------|------------------------------------------------------------------------------------------------------------------------------------------------------------------------------------------------------------------------------------------------------------------------------------------------------------------------------------------------------------------------------------------------------------------------------------------------------------------------------------------------------------------------------------------------------------------------------------------------------------------------------------------------------------------------------------------------------------------------------------------------------------------------------------------------------------------------------------------------------------------------------------------------------------------------------------------------------------------------------------------------------------------------------------------------------------------------------------------------------------------------------------------------------------------------------------------------------------------------------------------------------|
| <i>BdCXE51</i> | ATGGTCAGTAAGATCAAGAGACAATTGGCCTCTTTGCCTTTGTTTGCTAAAGCTGCTTTGTTGTG<br>TTGATCTTGTGTTATTATTGGCCGTCATCTTGTGGCAATTTCTTGATTCCACATCATCACAGAG<br>CTGAATTGCCACCAGCTTCTCCAGGTAACAACAATGGTTCTACTGGTCCAGATGATGTTGTTGCTT<br>TTGATTTCTCTCCATTCTTGGTCATGTACAAGTCTGGTAGAGTTCATAGAATGGATGGTACTGATA<br>GAGTCCAGCTGGTGTGATGAAGCTACTGGTGTTACTTCTAAGGATGTTGTTATCGATGGTAAG<br>ACTGGTTTGGCTGCTAGATTATACTTGCCAAGAGGTGGTGGTAAAGAAGAAGATCCAGTTTCTGG<br>TGCTTTGTTACCAGTTTGGTTTTTATCATGGTGGTGCCTTCGTTATTGAATCTGCTTTTACTCCAA<br>AGTACCACGTCTACTGAATTCCTTGGTGTCTAAGGCTGGTGTAGTTGCTGTTTCTGTTGAATATA<br>GATTGGCTCCAGAACATCCATTGCCAGCTGCTTATGAAGATTCTTGGAGAGCTTTGAATTGGGT<br>GCTAAAAATGCTGATGCTGGTCTGAACCTTGGTTGAGAGATAGAGGTAATTTGTCCAGATTATT<br>CGTTGCTGGTGATTCTGCTGGTGCTAATATTGCTCATAATATGGCTATGAGAGCTGGTAATGAAG<br>GTGGTTTAGCTGGTGGTGTCTATTACTGGTATTTTGTGTTAGATCCATACTTCTGGGGTAAAA<br>AACCTGTTGGTGTCTGAAACTACTGATCAAGCTAAAAGAAGACAATACGAAGCTACCTGGTCCTT<br>CATTTGTGATGGTAAATACGGTATCGATGACCCATTGATTGATCCTTTGGCTACTCCAGCTTCTGA<br>ATTGAGAAAAAATGGCTTGTGCTAGAGTTGCCGTTACTGTTTCTGGTTTGGATGATTTTGAAGAAA<br>GAGGTAAGGCTTACGCTGCTGCTTTAAGAGATTACGGTTGGGATGGTGAAGTTGTTCAATACGAA<br>ACTGCTGGTGAAAGACACGTTTACTTTTTGGATGCTCCAAAGAATCCAAAGTCCGCTAAAGAATT<br>GGCTTTTGTCTGCTGTTATTGTCTAGAGAATGA |
| <i>BdCXE52</i> | ATGGCTGGTTCTGGTGCTTCTAATGATGAAGTTGTTTTGGAAATCGAACACTGCATCAGAATCTTC<br>AAGTCTGGTAGAGTTGAAAGATACTTCGGTTCTGATCCAATTCCACCATCTACTGATGCTTCTACT<br>GGTGTGCTTCTAAGGATAGAACTATCTCTCCAGATGTTGCCGTCAGATTATACTTGCCACCAGTT<br>GCTGCTACTGGTTCAGGTGATGGTACTAAGAAATTGCCCTTTGTTGGTTTACTTTACGGTGGTGGT<br>TTTGTTTTACACACTGCTTTTAAACGCTGTTTTCCATGCTTATTTGGCTTCATTGGCTGCTAGAGCTA<br>GAGCAATAGTTGTTTCTGTTGATTACAGATTGGCTCCAGAACATCCATTGCCAGCTGCTTACGAA<br>GATTCCTGGAGAGCTTTGGTTTGGGCTGCTTCTCATGCTTCTGGTGGTTCATGTTGTGTTACTTCAG<br>AAGAAGCTGAAGAAGAACCCTTGGTTGACTGAACATGCTGATTTCTCCAGATTATTCTTGGGTGGT<br>GAATCTGCTGGTGCTAATATTGCTCATCATATGGCTATGAGAGCTGGTACTGATAGATTGCCAGC<br>CGGTGCTTCAATTTCTGGTATAGTTTTGGTTCACCCATACTTTTTGGGTCATGGTAAAGTTCCATCC<br>GAAGATTGAGATCCAGTTATGGCTGAAAACGTTGTTAAGATGTGGCATGTTGTTAGACCAACTAC<br>TACAGGTGTTGATGATCCTTGGATTAACCCATTGGCAGCTGGTGTCCACCAATGAGAGGTTTGG<br>CTTGCGGTAGAGTTTGTATGTTTGGCTGAAAACGATGTCTGTAGAGATAGAGGTAGAGCTTATT<br>GTGAAGGTTTGTATGGCTTCTGGTTGGGCTGGTGAAGTTGAAGTTTGGAAAGTTGCTGGTCAAGGT<br>CATTGCTTTCATTGGGTAATTCACCTGTGATGATGCCGTTAGACAAGATGATGCTATTGCTAGA<br>TTCTTGAACCCTTAA                                                                                                                                                  |
| <i>BdCXE53</i> | ATGTCTGACGCTGATGCTGGTGCTGACGAAGTCATACACGACGCTCCAAACTTCATAAGGGTCTA<br>CAAGTCTGGAAGGGTCGAGAGGTTCTTGCCAGTCGACTTCGCTCCACCTTCAATAGACCCAATA<br>CAGGAGTCTCTTCTAAGGACGTCCCAATATTGCCTGGTGCAGGAGTCTCTGCAAGGATTTACTTG<br>CCAGCAGCTCCTGCTGGTGGTCATCAGTCAAAGGTCCCAGTCTTGTGTTCTTCCACGGTGGAGG<br>ATTCTGCTTGGGTTCTGCATTGACGAGGCTGTCCACGGTCACGCAAACCAATTGTCTGCACAGG<br>CTTCAGTTATTGTCGTCTCAGTCGAGTACAGATTGGCACCAGAACATCCTGTCCAGCATTTGTAC<br>GAGGACGCATGGGCTGCATTGCAATGGGTCGCTGCTCATGCGGCGGGGACGGGACCTGAGCCTT<br>GGTTGACAGCTCACGCTGACTTTGGTAGGGTTCACGTCGGTGGTGAAGTCTGCTGGTGTAAACATA<br>GCACACCACACAGCAATGAGAGCAGGTGTGAGGAATTGGGACACGGAGTCAAAGTCAACTCA<br>TTGGTCTTGATTACCCATACTTCTTGGGAGGAGATTCTTCAGAGTCAGACGAGATGGGTATGGC<br>TTTGTGAGGGAGTTGGTCAGGTTGTGGCTGTTGTCTGCCCTGGTACTTCTGGTTGCGACGACCC<br>ATGGATTAACCCAATGTCAGACGGTGCTCCTTCTTTGGCAGGTTTAGGTTGTGCAAGGGCATTGG<br>TCTGCGTCGGAGGAAAGGACGCTATGAGGGGAAGGGTAGGTTGTACTGCGAGAAGTTGATGG<br>GTTCTGGTTGGCATGGTGAGGTTGAGGTTTGGGAGGCAGACGGTCAGGGTCACGGTTTCCACTTG<br>TTCTGCCAACATCAACACAGACTAAGGCACAGGTCAGAGTCATAACTGACTTTATGTCTAGGTAAC                                                                                                                                                                                        |

Table S2. *Cont.*

| Gene Name      | Codon Optimized Sequence (5' to 3')                                                                                                                                                                                                                                                                                                                                                                                                                                                                                                                                                                                                                                                                                                                                                                                                                                                                                                                                                                                                                                                                                                                                |
|----------------|--------------------------------------------------------------------------------------------------------------------------------------------------------------------------------------------------------------------------------------------------------------------------------------------------------------------------------------------------------------------------------------------------------------------------------------------------------------------------------------------------------------------------------------------------------------------------------------------------------------------------------------------------------------------------------------------------------------------------------------------------------------------------------------------------------------------------------------------------------------------------------------------------------------------------------------------------------------------------------------------------------------------------------------------------------------------------------------------------------------------------------------------------------------------|
| <i>BdCXE54</i> | ATGCCATCTGTTACCGTCAAGTTGTAATCTCTGATTTTCAAGTTGTTGTTGAGAAGAAGATTGTCC<br>TCCTTGTCTGTTTCTGATCCAGCTCCAGCTGGTGCAGCTTCTTCTTTGGTGTCTTCTCTAGACCAG<br>CTGATCATCATCCATCTCCACATTCTAATCCAGCTTTTCTACTGCTGCTCCAGATGCTGTTGCTA<br>CAAAAGACTTGCATCCAGATCCATTGTCATCTTGCATTGAGATTATTCTTGCCAAACCCACAT<br>CATGCTACTCCATTGAACAATCCACCACCACCTCCATTGAGAAGATCATCTTTCCAGAAAGAG<br>GTTGTAAGGGTAACTGGCAAAAAAGATATCCAGCTGCTTTTGAAGATGGTGTCACTGTTTGTAG<br>ATGGATTGCTAAGCAAGCTAATTTGGCTGCTTGTGGTAGAATGATGGCTAAAGGTGCTGGTACTT<br>GTGGTACTGATTCAATTTGGTGTCTATGGTTGAACCTTGGTTGGCTGCTCATGCTGATCCATCAA<br>GATGTGTTTTGTTGGGTGTTTCATGTGGTGCTAACATTGCTGATTACGTTGCTAGAAAAGCTGTTG<br>AAGCTGGTAAGTTTTTGGACCCAGTTAAGGTTGTTGCTCAAGTTTGTATGTACCCATTCTTCATGG<br>GTTCTTCTCCAACCTCAATCTGAATTGAAGTTGGCTAACTCTTACTTCTACGATAAGTCTACCTGTT<br>TGTTGGCTTGGAAAGTTGTTTTGCCTGAAGATGAATTCTGCTTGGATCATCCAGCAGCTAATCCAT<br>TATTGCCAGGTAGAGGTCCACCATTGAAATTGATGCCACCAACTTTGACTATCGTTGCTGAATTG<br>GATTGGATGAAGGATAGAGCTATTGCCTACTCTGAAGAATTGAGAAAGGTTAACCGTTGATGCC<br>CAGTTTTGGAATACAAAGATGCCGTTTCATGAATTTCGCTACTTTGGACGGTTTGTGAAAACCTCT<br>GAAGCTCAAGCCTGTGCTGAAGATATTGCTATTTGGGTTAAGAAGTACATCTCCTTGAGAGGTC<br>ACGAATTCTCTTACTGA |

Figure S1

**Figure S2.** Clustal W alignment of all putative *BdCXEs*. Green bars below the consensus sequence indicate conserved features in the order: HGG box, GXSG motif, active site acidic residue and active site histidine.

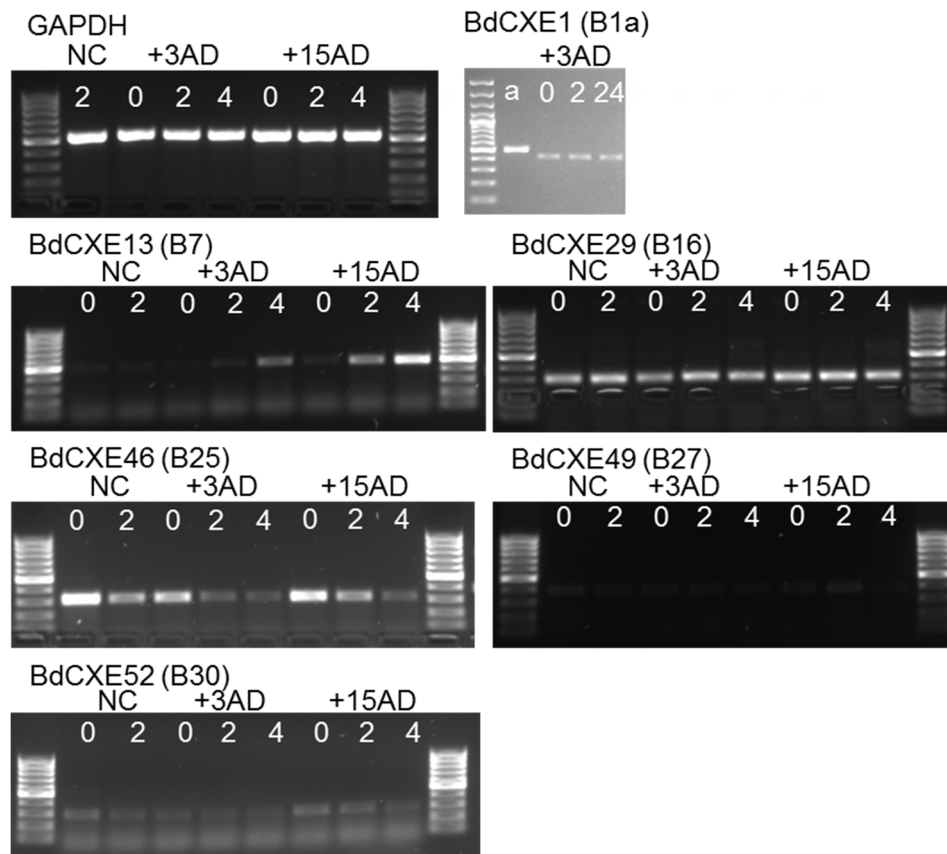

**Figure S2.** Real time polymerase chain reaction (RT-PCR) results for selected genes (in brackets the primer code according to Supplemental Table S2). NC indicates mock treated samples, the white numbers show the time point (h) of sampling after the indicated treatment, and (a) indicates PCR with *BdCXE1a* primers enclosing an intron using genomic DNA. As Marker GeneRuler 100 bp DNA ladder (LifeTechnologies, Carlsbad, CA, USA) was used.

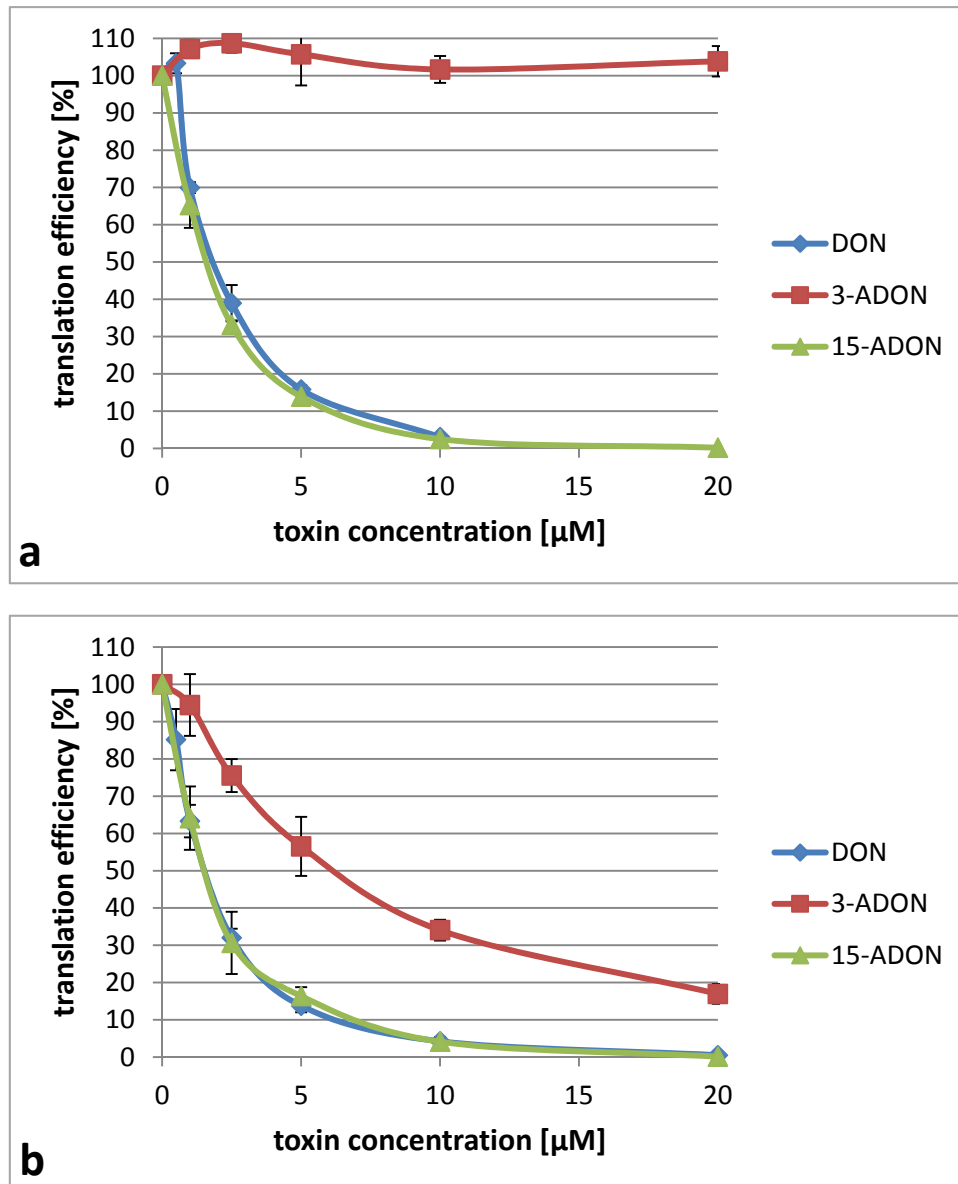

**Figure S3.** *In vitro* translation inhibition assays of the indicated toxins (a) rabbit reticulocyte lysate (b) wheat germ extract.

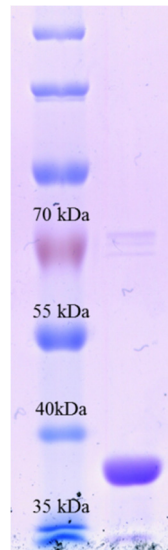

**Figure S4.** Sodium dodecyl sulfate polyacrylamide gel electrophoresis (SDS-PAGE) of the one step purified BdCXE29. Lane 1 PageRuler Prestained Protein ladder (Life Technologies, Carlsbad, CA, USA); Lane 2 IMAC purified BdCXE29 (BdCXE29-cHis6, 38.5 kDa).
