# Supplementary material for: Identification and Characterization of Carboxylesterases from Brachypodium distachyon Deacetylating Trichothecene Mycotoxins
Source: MDPI journal article supplement (doi:10.3390/toxins8010006), 2015-12-25
Supplement: s1 [file s1]

# Consensus

1 10 20 30 40 50 60 70 80 90 100 110 120 130  
 MSCRAAPWSSPSHPRGRPFASARLRTPFGHMHWNPTLKNLSRIGGVPMFMGLPSGLFRCMASSTGNGGFSPSSDTTPMPVYSWPDKQRPRLCILLGGFGGLYTAIRLESLWPGNNKQVLLWD

1. Bradi1g06241.1
2. Bradi1g17780.1
3. Bradi1g19713.1
4. Bradi1g19716.1
5. Bradi1g19720.1
6. Bradi1g19730.1
7. Bradi1g19750.2
8. Bradi1g19760.1
9. Bradi1g21890.1
10. Bradi1g38325.1
11. **Bradi1g45921.1**
12. Bradi1g45930.1
13. Bradi1g45945.1
14. Bradi1g45960.1
15. Bradi1g48173.1
16. Bradi1g48203.1
17. Bradi1g50705.1
18. Bradi1g56807.1
19. Bradi1g56817.2
20. Bradi1g56830.1
21. Bradi1g56860.1
22. Bradi1g56870.1
23. Bradi1g56910.1
24. Bradi1g67600.1
25. Bradi1g67930.1
26. Bradi1g74240.1
27. Bradi2g01817.1
28. Bradi2g25470.1
29. Bradi2g25600.1
30. Bradi2g27300.1
31. Bradi2g57920.1
32. Bradi3g21747.1
33. Bradi3g38040.1
34. Bradi3g38045.1
35. Bradi3g38050.1
36. Bradi3g38060.1
37. Bradi3g38070.1
38. Bradi3g38080.1
39. Bradi3g38090.2
40. Bradi4g12370.1
41. Bradi4g21690.1
42. Bradi4g21700.1
43. Bradi4g24773.1
44. Bradi4g32080.1
45. Bradi4g32080.2
46. Bradi4g32300.1
47. Bradi4g32310.1
48. Bradi4g32320.1
49. Bradi4g32330.2
50. Bradi4g32340.1
51. Bradi4g32350.1
52. Bradi4g32360.1
53. Bradi4g39410.1
54. Bradi4g39410.2
55. Bradi3g42207.1
56. Bradi3g46450.1
57. Bradi3g46460.1
58. Bradi5g08900.1
59. Bradi5g11800.1

MSCRAAPWSSPSHPRGRPFASARLRTPFGHMHWNPTLKNLSRIGGVPMFMGLPSGLFRCMASSTGNGGFSPSSDTTPMPVYSWPDKQRPRLCILLGGFGGLYTAIRLESLWPGNNKQVLLWD

Consensus

140 150 160 170 180 190 200 210 220 230 240 250 260  
QSDREFKPMIYELLSGPMDWBLAPYFTLLKNTSQFVKDSMKLLRPSDHLRRPPGGSCGGVHLESGTVIFYDWLVIALGAFAKIDVVPGSABHATPFTTLBHAKVPSBIKMLERRRFGKSSPPI

- 1. Bradi1g06241.1
- 2. Bradi1g17780.1
- 3. Bradi1g19713.1
- 4. Bradi1g19716.1
- 5. Bradi1g19720.1
- 6. Bradi1g19730.1
- 7. Bradi1g19750.2
- 8. Bradi1g19760.1
- 9. Bradi1g21890.1
- 10. Bradi1g38325.1
- 11. **Bradi1g45921.1**
- 12. Bradi1g45930.1
- 13. Bradi1g45945.1
- 14. Bradi1g45960.1
- 15. Bradi1g48173.1
- 16. Bradi1g48203.1
- 17. Bradi1g50705.1
- 18. Bradi1g56807.1
- 19. Bradi1g56817.2
- 20. Bradi1g56830.1
- 21. Bradi1g56860.1
- 22. Bradi1g56870.1
- 23. Bradi1g56910.1
- 24. Bradi1g67600.1
- 25. Bradi1g67930.1
- 26. Bradi1g74240.1
- 27. Bradi2g01817.1
- 28. Bradi2g25470.1
- 29. Bradi2g25600.1
- 30. Bradi2g27300.1
- 31. Bradi2g57920.1
- 32. Bradi3g21747.1
- 33. Bradi3g38040.1
- 34. Bradi3g38045.1
- 35. Bradi3g38050.1
- 36. Bradi3g38060.1
- 37. Bradi3g38070.1
- 38. Bradi3g38080.1
- 39. Bradi3g38090.2
- 40. Bradi4g12370.1
- 41. Bradi4g21690.1
- 42. Bradi4g21700.1
- 43. Bradi4g24773.1
- 44. Bradi4g32080.1
- 45. Bradi4g32080.2
- 46. Bradi4g32300.1
- 47. Bradi4g32310.1
- 48. Bradi4g32320.1
- 49. Bradi4g32330.2
- 50. Bradi4g32340.1
- 51. Bradi4g32350.1
- 52. Bradi4g32360.1
- 53. Bradi4g39410.1
- 54. Bradi4g39410.2
- 55. Bradi3g42207.1
- 56. Bradi3g46450.1
- 57. Bradi3g46460.1
- 58. Bradi5g08900.1
- 59. Bradi5g11800.1

QSDREFKPMIYELLSGPMDWBLAPYFTLLKNTSQFVKDSMKLLRPSDHLRRPPGGSCGGVHLESGTVIFYDWLVIALGAFAKIDVVPGSABHATPFTTLBHAKVPSBIKMLERRRFGKSSPPI

Consensus

270 280 290 300 310 320 330 340 350 360 370 380 390  
EVAIVGLGYSGVPLAATISERLKNLTGTWKAINVQTTICPSAPPGNRDAATKMLLSQNTQITFLGYSMSCVRFFYASDDSSSMATDEKLAGGDHKKLLVPIQPAQRGIQSOMLEADIMLWTVGSTSQIPRLQ

- 1. Bradi1g06241.1
- 2. Bradi1g17780.1
- 3. Bradi1g19713.1
- 4. Bradi1g19716.1
- 5. Bradi1g19720.1
- 6. Bradi1g19730.1
- 7. Bradi1g19750.2
- 8. Bradi1g19760.1
- 9. Bradi1g21890.1
- 10. Bradi1g38325.1
- 11. Bradi1g45921.1
- 12. Bradi1g45930.1
- 13. Bradi1g45945.1
- 14. Bradi1g45960.1
- 15. Bradi1g48173.1
- 16. Bradi1g48203.1
- 17. Bradi1g50705.1
- 18. Bradi1g56807.1
- 19. Bradi1g56817.2
- 20. Bradi1g56830.1
- 21. Bradi1g56860.1
- 22. Bradi1g56870.1
- 23. Bradi1g56910.1
- 24. Bradi1g67600.1
- 25. Bradi1g67930.1
- 26. Bradi1g74240.1
- 27. Bradi2g01817.1
- 28. Bradi2g25470.1
- 29. Bradi2g25600.1
- 30. Bradi2g27300.1
- 31. Bradi2g57920.1
- 32. Bradi3g21747.1
- 33. Bradi3g38040.1
- 34. Bradi3g38045.1
- 35. Bradi3g38050.1
- 36. Bradi3g38060.1
- 37. Bradi3g38070.1
- 38. Bradi3g38080.1
- 39. Bradi3g38090.2
- 40. Bradi4g12370.1
- 41. Bradi4g21690.1
- 42. Bradi4g21700.1
- 43. Bradi4g24773.1
- 44. Bradi4g32080.1
- 45. Bradi4g32080.2
- 46. Bradi4g32300.1
- 47. Bradi4g32310.1
- 48. Bradi4g32320.1
- 49. Bradi4g32330.2
- 50. Bradi4g32340.1
- 51. Bradi4g32350.1
- 52. Bradi4g32360.1
- 53. Bradi4g39410.1
- 54. Bradi4g39410.2
- 55. Bradi3g42207.1
- 56. Bradi3g46450.1
- 57. Bradi3g46460.1
- 58. Bradi5g08900.1
- 59. Bradi5g11800.1

EVAIVGLGYSGVPLAATISERLKNLTGTWKAINVQTTICPSAPPGNRDAATKMLLSQNTQITFLGYSMSCVRFFYASDDSSSMATDEKLAGGDHKKLLVPIQPAQRGIQSOMLEADIMLWTVGSTSQIPRLQ

## Consensus

1. Bradi1g06241.1
2. Bradi1g17780.1
3. Bradi1g197713.1
4. Bradi1g197716.1
5. Bradi1g19720.1
6. Bradi1g19730.1
7. **Bradi1g19750.2**
8. Bradi1g19760.1
9. Bradi1g21890.1
10. Bradi1g382325.1
11. **Bradi1g45921.1**
12. Bradi1g45930.1
13. Bradi1g45945.1
14. Bradi1g45960.1
15. Bradi1g48173.1
16. Bradi1g48203.1
17. Bradi1g50705.1
18. Bradi1g56807.1
19. Bradi1g56817.2
20. Bradi1g56830.1
21. Bradi1g56860.1
22. Bradi1g56870.1
23. Bradi1g56910.1
24. Bradi1g67600.1
25. Bradi1g67930.1
26. Bradi1g74240.1
27. Bradi2g01817.1
28. Bradi2g25470.1
29. Bradi2g25600.1
30. Bradi2g27300.1
31. Bradi2g57920.1
32. Bradi3g21747.1
33. Bradi3g38040.1
34. Bradi3g38045.1
35. Bradi3g38050.1
36. Bradi3g38060.1
37. Bradi3g38070.1
38. Bradi3g38080.1
39. **Bradi3g38090.2**
40. Bradi4g12370.1
41. Bradi4g21690.1
42. Bradi4g21700.1
43. Bradi4g24773.1
44. Bradi4g32080.1
45. **Bradi4g32080.2**
46. **Bradi4g32300.1**
47. Bradi4g32310.1
48. Bradi4g32320.1
49. **Bradi4g32330.2**
50. **Bradi4g32340.1**
51. Bradi4g32350.1
52. Bradi4g32360.1
53. Bradi4g39410.1
54. Bradi4g39410.2
55. Bradi3g42207.1
56. Bradi3g46450.1
57. Bradi3g46460.1
58. Bradi5g08900.1
59. Bradi5g11800.1

400 410 420 430 440 450 460 470 480 490 500 510 520

P P D A P Y V I P L N G R G Q V E T F E T L Q V K G H P R T F A T G D S A A T R D P S G K F I P A N A Q V A F Q Q A D F A G W N T W A A T I N D R P L I J P F R F O N T G E M M X J X X X X X X X T X X X X X X X T X T S K S S X N W A R X X X S L X X X X X X N X A X

MTTPFFTQASDDK**L**SDVSIQIALPM

PPDAPYVIPLNGRGQVETETLTQVKGHPRTFALGDSAAIRDPGKFLPANAQVAFQQADFAGWNIWAAINDRPLLPFRFQNLGEMMTLGRNDAATASFIEGLTLEGPLGHAARKLVYCLRMPTDEHRVK

MIPASPPSICRPGRLKIVLDRSNSALTRKVASVIQSLLLYSTTE

MDESKLSPNYLIPSWPLVLTCPANLIHA  
MRARAQRLICSSVNTMPFFSMAIRSGANIWAG

MVIPVANSAR  
MVSKIKRQLASLPLFAKAALLLL---I

530 540 550 560 570 580 590 600 610 620 630 640 650

T A T A S M A A L P A M F V X X X X G T R Y K D G R V R X G P X V P A S X D A A T G V A S K D V I D

1. Bradi1g06241.1  
2. Bradi1g17780.1  
3. Bradi1g19713.1  
4. Bradi1g19716.1  
5. Bradi1g19720.1  
6. Bradi1g19730.1  
7. Bradi1g19750.2  
8. Bradi1g19760.1  
9. Bradi1g21890.1  
10. Bradi1g38325.1  
11. Bradi1g45921.1  
12. Bradi1g45930.1  
13. Bradi1g45945.1  
14. Bradi1g45960.1  
15. Bradi1g48173.1  
16. Bradi1g48203.1  
17. Bradi1g50705.1  
18. Bradi1g56807.1  
19. Bradi1g56817.2  
20. Bradi1g56830.1  
21. Bradi1g56860.1  
22. Bradi1g56870.1  
23. Bradi1g56910.1  
24. Bradi1g67600.1  
25. Bradi1g67930.1  
26. Bradi1g74240.1  
27. Bradi2g01817.1  
28. Bradi2g25470.1  
29. Bradi2g25600.1  
30. Bradi2g27300.1  
31. Bradi2g57920.1  
32. Bradi3g21747.1  
33. Bradi3g38040.1  
34. Bradi3g38045.1  
35. Bradi3g38050.1  
36. Bradi3g38060.1  
37. Bradi3g38070.1  
38. Bradi3g38080.1  
39. Bradi3g38090.2  
40. Bradi4g12370.1  
41. Bradi4g21690.1  
42. Bradi4g21700.1  
43. Bradi4g24773.1  
44. Bradi4g32080.1  
45. Bradi4g32080.2  
46. Bradi4g32300.1  
47. Bradi4g32310.1  
48. Bradi4g32320.1  
49. Bradi4g32330.2  
50. Bradi4g32340.1  
51. Bradi4g32350.1  
52. Bradi4g32360.1  
53. Bradi4g39410.1  
54. Bradi4g39410.2  
55. Bradi3g42207.1  
56. Bradi3g46450.1  
57. Bradi3g46460.1  
58. Bradi5g08900.1  
59. Bradi5g11800.1



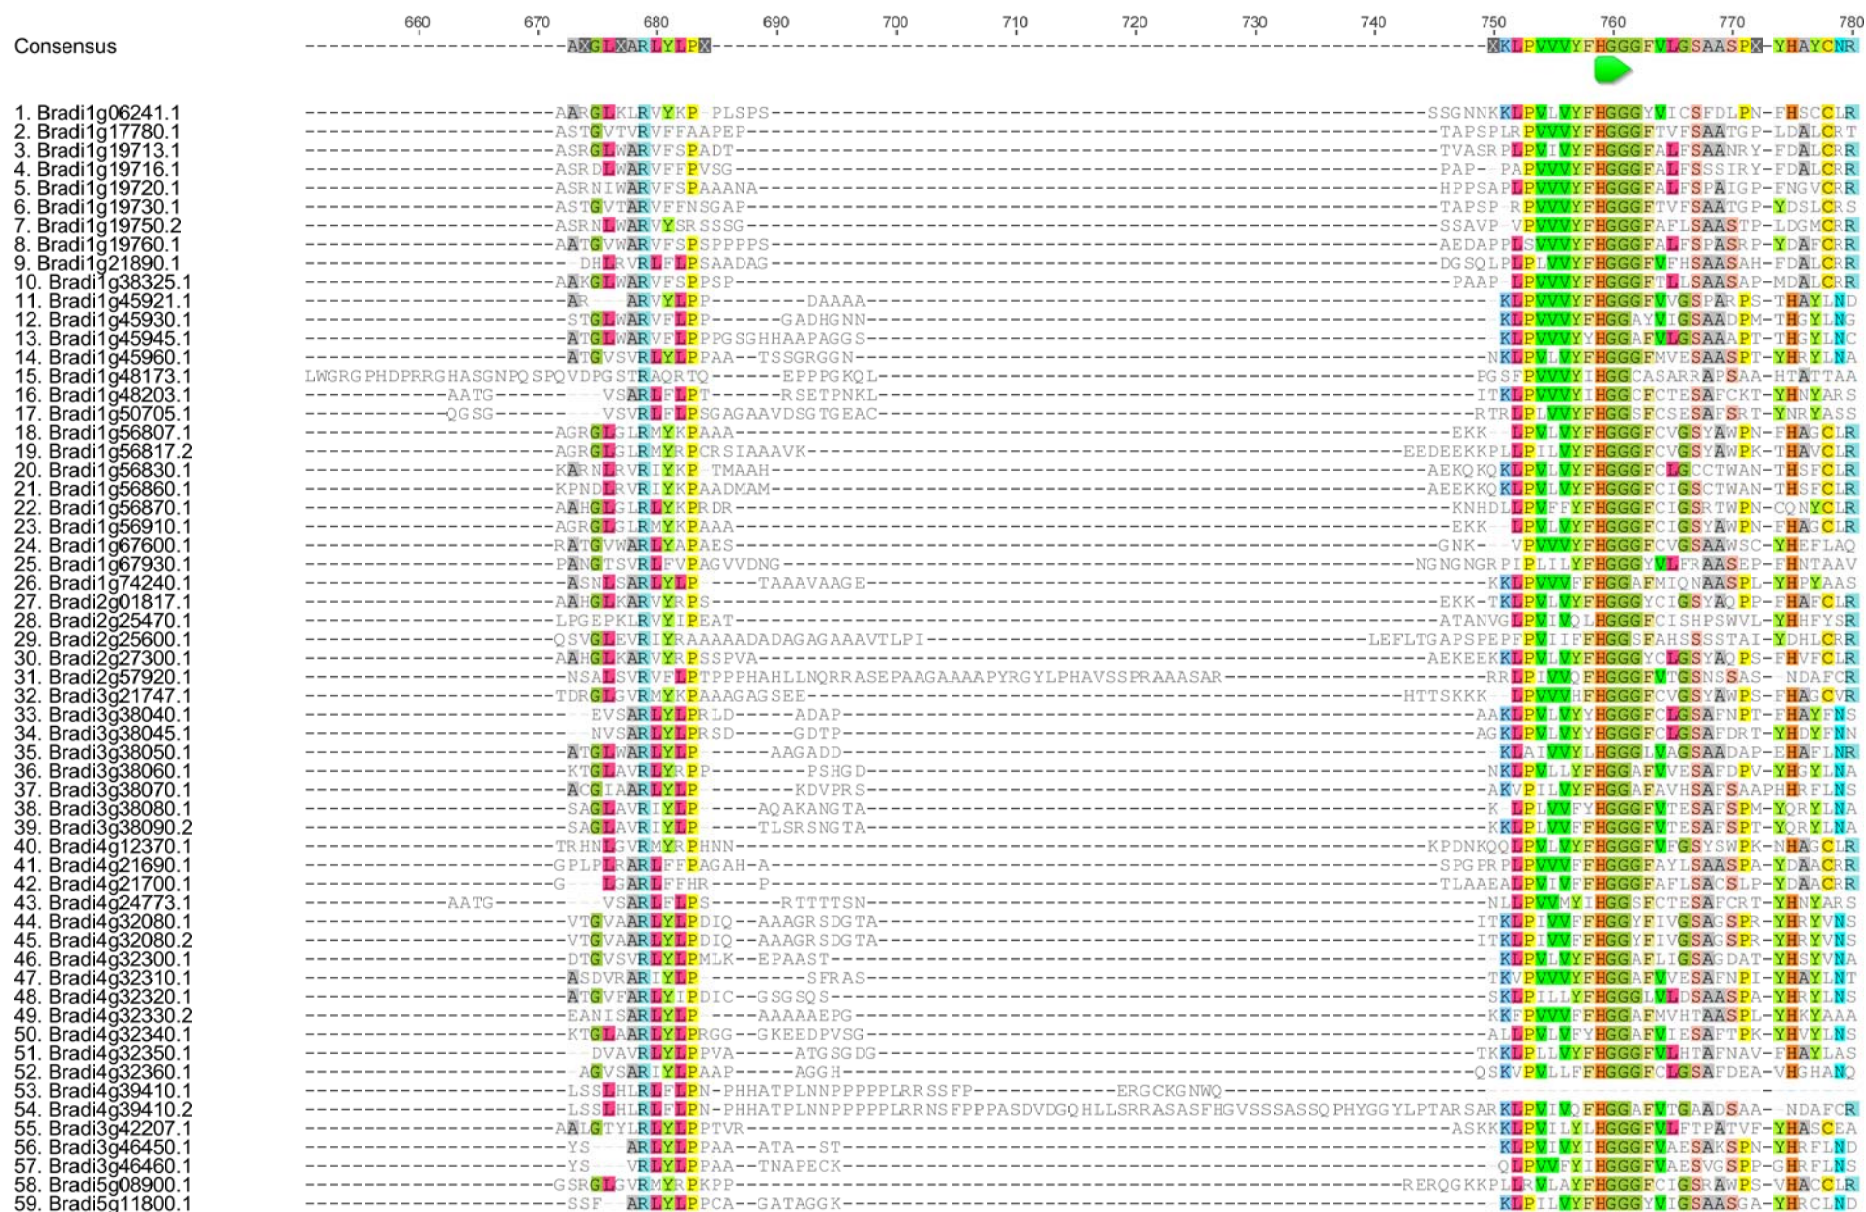



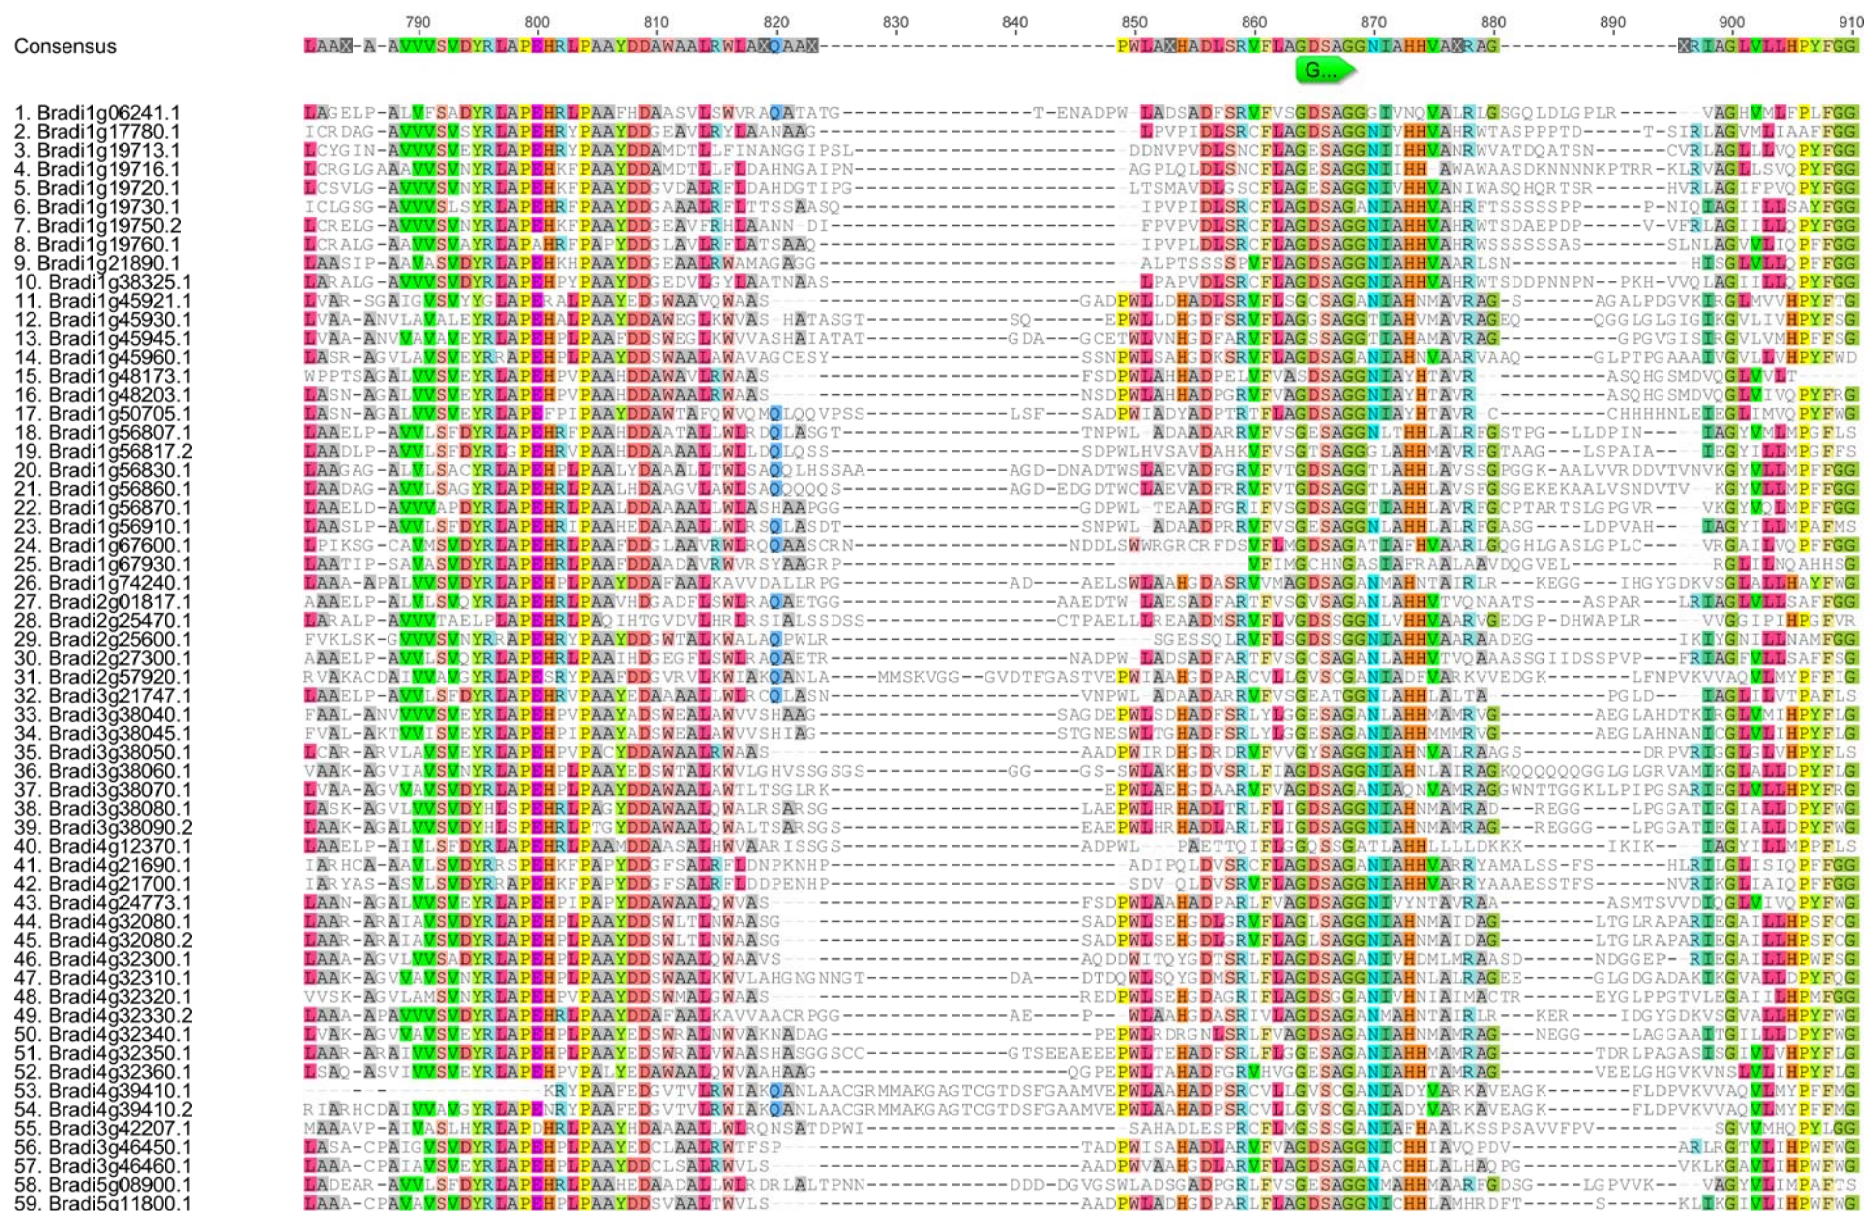



## Consensus

|                    |                          |     |                |                     |                      |                              |                   |                        |                   |                       |       |            |       |
|--------------------|--------------------------|-----|----------------|---------------------|----------------------|------------------------------|-------------------|------------------------|-------------------|-----------------------|-------|------------|-------|
|                    | 920                      | 930 | 940            | 950                 | 960                  | 970                          | 980               | 990                    | 1,000             | 1,010                 | 1,020 | 1,030      | 1,040 |
| Consensus          | QRTASSPFLDGG             | --- | XXXDRDWR       | ACLPAGAGRDHPNANPAPG | ---                  | APKL-ALACPRVGVVAGSD          | ---               | KLDRGRAYALIRASG        | ---               | ---                   | ---   | VLVFPFGHGF | ---   |
| 1. Bradi1g06241.1  | QRTASSAEYPPG             | --- | PHLSLPVL       | DGKWR               | ---                  | LAEPVGATRDHPLANPLGPGS        | ---               | PALEIVAGALPPLVGVVGLD   | ---               | LIRDRAVDYAARLEAVGHA   | ---   | ---        | ---   |
| 2. Bradi1g17780.1  | QRTDSSLAIEGV             | --- | APIVNLRRS      | DFWKK               | ---                  | AFEPVGADRNHPTAHTVTGAG        | ---               | PEELIAEA-FPPAMVGVVGLD  | ---               | PLQDWQRYYAAMLRKKG     | ---   | ---        | ---   |
| 3. Bradi1g19713.1  | QRTTNSLMIEGV             | --- | APIVNLRRQ      | DFWKK               | ---                  | AFEPVGANRDHPAAHTVTGEN        | ---               | AEISEV-FPPAIVGVVGLD    | ---               | PLQDWQRYYADVLRKKG     | ---   | ---        | ---   |
| 4. Bradi1g19716.1  | QRTESSLAIDGV             | --- | APIVSLRRS      | DFWKK               | ---                  | AFEPAGATRDHPAAHTVTEDN        | ---               | VGIAEEGFPPMVAVGVVGLD   | ---               | PLQDWQRYYADVLRKKG     | ---   | ---        | ---   |
| 5. Bradi1g19720.1  | QRTTPSVRIIEGI            | --- | APVVNLRRS      | DWSWK               | ---                  | AFEPAGATRDHPAAHTVTDN         | ---               | AGIAEEGFPPMVAVGVVGLD   | ---               | PLQDWQRYYADVLRKKG     | ---   | ---        | ---   |
| 6. Bradi1g19730.1  | QRTESSLAIEGV             | --- | APIVNLRRS      | DFWKK               | ---                  | AFEPAGADRNHPTAHTVTGAG        | ---               | PEELIGEA-FPPAMVGVVGLD  | ---               | PLQDWQRYYAAMLRKKG     | ---   | ---        | ---   |
| 7. Bradi1g19750.2  | QRTTAASLSIEGV            | --- | APVVNMRRS      | DWSWK               | ---                  | AFEPVGADRNHPTAHTVTGAA        | ---               | PEELIGEN-FPPAMVGVVGLD  | ---               | PLQDWQRYYAAMLRKKG     | ---   | ---        | ---   |
| 8. Bradi1g19760.1  | QRTTAASLEIDKA            | --- | IPSLSMAIT      | DAYWR               | ---                  | DFEPGATRDHAAAACGVG           | ---               | ELIAEA-FPPAMVGVVGLD    | ---               | LIRKQWQARVVKLRGK      | ---   | ---        | ---   |
| 9. Bradi1g21890.1  | QSPTASLRIRG              | --- | APFGAPERLAW    | FWR                 | ---                  | LGMPGATRGHEAADVPAIS          | ---               | RAGARVPFPATLVGVVGLD    | ---               | AHQDQRAYARLRDAAGAE    | ---   | ---        | ---   |
| 10. Bradi1g38325.1 | QRTGSSLSIEGV             | --- | APVVNMRRS      | DWSWK               | ---                  | AFEPGADRNHPTAHTVTGAE         | ---               | PEELIGES-FPPAMVGVVGLD  | ---               | PLQDWQRYYAVMERKNR     | ---   | ---        | ---   |
| 11. Bradi1g45921.1 | KIPVGAALGPVDR            | --- | EFMDRTWR       | FVFPGT              | ---                  | SGLDPRVNFVFDCA               | ---               | ARAASAIPCRVGVVGLD      | ---               | PLQDWQRYYAAMLRKKG     | ---   | ---        | ---   |
| 12. Bradi1g45930.1 | VA-DIGKATTKKEEK          | --- | AKADAFWK       | FLYPDAPILG          | ---                  | DLPLSNFESAA                  | ---               | GSAARIGRVRGVVGLD       | ---               | PLQDWQRYYAAMLRKKG     | ---   | ---        | ---   |
| 13. Bradi1g45945.1 | VA-DIGKATTKK             | --- | K              | ---                 | AWTDAWR              | FRHPAAPILG                   | ---               | DLPLSNFESAA            | ---               | GSAARIGRVRGVVGLD      | ---   | ---        | ---   |
| 14. Bradi1g45960.1 | ASNAMGPLETR              | --- | ---            | ---                 | IRGEWR               | FTWARPEAVDDRLCPTCAPG         | ---               | AAGRILALPCCRVMVAGSD    | ---               | PLQDWQRYYAAMLRKKG     | ---   | ---        | ---   |
| 15. Bradi1g48173.1 | ---                      | --- | DCREVDWGGAG    | ---                 | AVFLTWL              | DRVWP                        | ---               | YVTAGRAGNDPRIDPTA      | ---               | ---                   | ---   | ---        | ---   |
| 16. Bradi1g48203.1 | VDRLPSSSTNEANNAG         | --- | VLPACLV        | DRVWP               | ---                  | YVTGGRVGNDRHIDPTA            | ---               | DEIS-SITCRVGVVGLD      | ---               | PLQDWQRYYAAMLRKKG     | ---   | ---        | ---   |
| 17. Bradi1g50705.1 | SDGRLPSTDPVPAGSLFMPAYGV  | --- | DRVWP          | ---                 | YVTGGRVGNDRHIDPTA    | ---                          | DEIS-SITCRVGVVGLD | ---                    | PLQDWQRYYAAMLRKKG | ---                   | ---   | ---        | ---   |
| 18. Bradi1g56807.1 | QRTTSSLESAPATA           | --- | FLTRDMC        | DTISR               | ---                  | LFPAGADKDHPLINPLGPGS         | ---               | PSLD-PILDVGVVAGSD      | ---               | PLQDWQRYYAAMLRKKG     | ---   | ---        | ---   |
| 19. Bradi1g56817.2 | GQPTSSLETPEATA           | --- | WLTDRMF        | DRFR                | ---                  | LGMPAGATR                    | ---               | VRPEQ                  | ---               | PLQDWQRYYAAMLRKKG     | ---   | ---        | ---   |
| 20. Bradi1g56830.1 | QRTLPSSHAESTR            | --- | LMNRDTL        | DRVWP               | ---                  | LAPAGATRDHPLANPLGPGS         | ---               | PGLEPVA                | ---               | PLQDWQRYYAAMLRKKG     | ---   | ---        | ---   |
| 21. Bradi1g56860.1 | QRTTSSHAESTPTTFPPPLMSLDL | --- | DRVWP          | ---                 | LAPAGATRDHPLANPLGPGS | ---                          | PGLEAVE           | ---                    | PLQDWQRYYAAMLRKKG | ---                   | ---   | ---        | ---   |
| 22. Bradi1g56870.1 | TTRTSSAECDDA             | --- | FLNRPLN        | DRVWP               | ---                  | LSPLGATADHPASNPFPAGES        | ---               | REALA                  | ---               | PLQDWQRYYAAMLRKKG     | ---   | ---        | ---   |
| 23. Bradi1g56910.1 | QPTTSSLDSPATA            | --- | FLTRDMC        | DTISR               | ---                  | LSPAGADKDHPLINPLGPGS         | ---               | PSLD-PILDVGVVAGSD      | ---               | PLQDWQRYYAAMLRKKG     | ---   | ---        | ---   |
| 24. Bradi1g67600.1 | QRTTSSKTMAQPP            | --- | RSALSLSTSSSYR  | ---                 | MAEPAGAGRDHPNANPAPG  | ---                          | RGAR              | ---                    | PLQDWQRYYAAMLRKKG | ---                   | ---   | ---        | ---   |
| 25. Bradi1g67930.1 | VQRTTASASVD              | --- | DRVLPLPAND     | LEWE                | ---                  | LAPVGADRDHPCNPGAMLA          | ---               | VVGASQLRRLPCLGRKKD     | ---               | PPDRQKVLVDALRDAG      | ---   | ---        | ---   |
| 26. Bradi1g74240.1 | KIPVGGPADAGYR            | --- | ---            | ---                 | GGIEQVWE             | RACGGSGHDPHINPAA             | ---               | A                      | ---               | PEEWR-RIGCRVLVATAEELC | ---   | ---        | ---   |
| 27. Bradi2g01817.1 | NRTPATATSPAD             | --- | VSLTVDVAD      | DRVWP               | ---                  | LAPAGATRDHPLANPLGPGS         | ---               | PEIPE                  | ---               | AVELPVLVGVVGLD        | ---   | ---        | ---   |
| 28. Bradi2g25460.1 | AARSSSLEPRPD             | --- | SVFPTLMDL      | DKFLA               | ---                  | MAEPAGATKDHBYTCPMG           | ---               | ADAPP                  | ---               | ESVPLPMMVAGSD         | ---   | ---        | ---   |
| 29. Bradi2g25600.1 | NRTTSSRRIDG              | --- | KYFVTLDQ       | DRWYWK              | ---                  | MAEPEDARDHPCNPGANG           | ---               | ---                    | ---               | RLRGLPFTKSLIISGLD     | ---   | ---        | ---   |
| 30. Bradi2g27300.1 | VQRTTASIDSPAD            | --- | VSLTADMDA      | DRVWP               | ---                  | LAPAGATRDHPLANPLGPGS         | ---               | PSLD-PILDVGVVAGSD      | ---               | PLQDWQRYYAAMLRKKG     | ---   | ---        | ---   |
| 31. Bradi2g57920.1 | SVPTHSIRLANSY            | --- | FYDKSTCLLAW    | ---                 | LLSEKEFSLDHPANPLGPGS | ---                          | ---               | ---                    | ---               | PPLKMBPTTIIAEHD       | ---   | ---        | ---   |
| 32. Bradi3g21747.1 | QPTTSSLDTPATA            | --- | FLTRDLN        | DRVWP               | ---                  | LFPAGADKDHPLINPLGPGS         | ---               | PSLE-PILDVGVVAGSD      | ---               | PLQDWQRYYAAMLRKKG     | ---   | ---        | ---   |
| 33. Bradi3g38040.1 | SN-KVDSDDIDPATR          | --- | ESLGSWS        | VMCPITT             | ---                  | GEDDPLINPLGPGS               | ---               | APDLA                  | ---               | ACRVMVAGSD            | ---   | ---        | ---   |
| 34. Bradi3g38045.1 | SN-KVNSDDIDLAAR          | --- | DRLGKWH        | AVCPMTI             | ---                  | GEDDPLINPLGPGS               | ---               | APDLA                  | ---               | ACRVMVAGSD            | ---   | ---        | ---   |
| 35. Bradi3g38050.1 | GKGLASGEMKHAWL           | --- | AKLEEMWA       | FACAGRTT            | ---                  | GLDPRVNVADGA                 | ---               | ESLTLR                 | ---               | LACRVMVAGSD           | ---   | ---        | ---   |
| 36. Bradi3g38060.1 | ---                      | --- | PHADPG         | ---                 | ---                  | AERAWG-FICAGRY               | ---               | GTEHBYVNBMSLP          | ---               | AEAWRRG               | ---   | ---        | ---   |
| 37. Bradi3g38070.1 | KD-PLPS                  | --- | SRNPNPGL       | ---                 | ---                  | QRAERSWG-FVCSWRY             | ---               | GIDHFINPLA             | ---               | MP                    | ---   | ---        | ---   |
| 38. Bradi3g38080.1 | KR-PVPS                  | --- | TRDPEER        | ---                 | ---                  | RMKEQSWF-FICAGKY             | ---               | GADDPVINPVA            | ---               | MA                    | ---   | ---        | ---   |
| 39. Bradi3g38090.2 | KR-PVPS                  | --- | TRDAELR        | ---                 | ---                  | RWRERTWS-FVCGKF              | ---               | GADDPVINPVA            | ---               | ME                    | ---   | ---        | ---   |
| 40. Bradi4g12370.1 | KVTCSSLDAPDAA            | --- | FLSRAAS        | DRYFR               | ---                  | LMMAGADKDHPLINPLGPGS         | ---               | PSLD-TAHVGRVGVVAGSD    | ---               | MVRDKDVEYARIRAYGKD    | ---   | ---        | ---   |
| 41. Bradi4g21690.1 | QRTTASLEIDG              | --- | APIVSVSRCDMMWR | ---                 | AFEPGADRDHPCNPGAMLA  | ---                          | AGVESNA           | ---                    | ---               | FPPAMVGVVGLD          | ---   | ---        | ---   |
| 42. Bradi4g21700.1 | QRTGSSLRIDG              | --- | APIVSVGRTDMMWR | ---                 | AFEPGADRDHPCNPGAMLA  | ---                          | AGVEEEE           | ---                    | ---               | FPPAMVGVVGLD          | ---   | ---        | ---   |
| 43. Bradi4g24773.1 | TTRLPSSLAEDAGA           | --- | VLPACLV        | DRVWP               | ---                  | YVTAGRAGNDPRINPRD            | ---               | EDIA-SITACRVMVAGSD     | ---               | PLQDWQRYYAAMLRKKG     | ---   | ---        | ---   |
| 44. Bradi4g32080.1 | Q-RMEAIAEEH              | --- | W              | ---                 | ---                  | ASVKKRW-VICPGARGGLDPRMNPTAG  | ---               | APSLA                  | ---               | ACRVMVAGSD            | ---   | ---        | ---   |
| 45. Bradi4g32080.2 | Q-RMEAIAEEH              | --- | W              | ---                 | ---                  | ASVKKRW-VICPGARGGLDPRMNPTAG  | ---               | APSLA                  | ---               | ACRVMVAGSD            | ---   | ---        | ---   |
| 46. Bradi4g32300.1 | ST-AIEGPPAA              | --- | A              | ---                 | ---                  | MITGMWS-YACGAVGGLDPRMNPLGPGS | ---               | APALEK                 | ---               | CVRMVAGSD             | ---   | ---        | ---   |
| 47. Bradi4g32310.1 | RS-AVGADSM               | --- | PAYL           | ---                 | ---                  | QSAARWS-FICAGKY              | ---               | PIDHBYANPLA            | ---               | LP                    | ---   | ---        | ---   |
| 48. Bradi4g32320.1 | KD-PVEG                  | --- | ATEG           | ---                 | ---                  | EFGEK                        | ---               | WLLIICPEGTEGADPRINPMAH | ---               | ---                   | ---   | ---        | ---   |
| 49. Bradi4g32330.2 | KD-PVGG                  | --- | ESAD           | ---                 | ---                  | AAAYR                        | ---               | GGFERAW                | ---               | ---                   | ---   | ---        | ---   |
| 50. Bradi4g32340.1 | KK-PVGA                  | --- | TTDQAKR        | ---                 | ---                  | RQYEATWS-FICDGKY             | ---               | GIDDPLINPLA            | ---               | TP                    | ---   | ---        | ---   |
| 51. Bradi4g32350.1 | HG-KVPS                  | --- | DDSDPVMA       | ---                 | ---                  | ENNVKMWH-VVRPTT              | ---               | GVDPRMNPLGPGS          | ---               | ---                   | ---   | ---        | ---   |
| 52. Bradi4g32360.1 | GD-SSEDEM                | --- | GALL           | ---                 | ---                  | RELVRWVPVVCPTS               | ---               | GCDDWINPMSDG           | ---               | ---                   | ---   | ---        | ---   |
| 53. Bradi4g39410.1 | SSPTSSSLKANSY            | --- | FYDKSTCLLAW    | ---                 | ---                  | LFLPEDEFCLDHPANPLGPGS        | ---               | ---                    | ---               | ---                   | ---   | ---        | ---   |
| 54. Bradi4g39410.2 | SSPTSSSLKANSY            | --- | FYDKSTCLLAW    | ---                 | ---                  | LFLPEDEFCLDHPANPLGPGS        | ---               | ---                    | ---               | ---                   | ---   | ---        | ---   |
| 55. Bradi3g42207.1 | QRTTASAASEG              | --- | DAMLPLEAS      | DKWR                | ---                  | LAPGADRDHPCNPGAMLA           | ---               | AK                     | ---               | SMAAEDLAG             | ---   | ---        | ---   |
| 56. Bradi3g46450.1 | SS-AVG                   | --- | ETRDPAR        | ---                 | ---                  | AMGCKWK-FACGSA               | ---               | GDDPRMNPLGPGS          | ---               | ---                   | ---   | ---        | ---   |
| 57. Bradi3g46460.1 | SS-AVG                   | --- | ESRHPVAR       | ---                 | ---                  | AMGGRWT-FACGTS               | ---               | GDDPRMNPLGPGS          | ---               | ---                   | ---   | ---        | ---   |
| 58. Bradi5g08900.1 | APTESLESAPATA            | --- | ALSRDVAERYNR   | ---                 | ---                  | LAPAGANKDHPNANPAPG           | ---               | PGL                    | ---               | ---                   | ---   | ---        | ---   |
| 59. Bradi5g11800.1 | KPIAG                    | --- | EARQRDEK       | ---                 | ---                  | GWE-FVCGAAGGLDPRMNPTAG       | ---               | APLET                  | ---               | ACRVMVAGSD            | ---   | ---        | ---   |



## Consensus

|                    |           |         |              |          |            |        |       |             |           |       |       |       |        |       |
|--------------------|-----------|---------|--------------|----------|------------|--------|-------|-------------|-----------|-------|-------|-------|--------|-------|
|                    |           | 1,050   | 1,060        | 1,070    | 1,080      | 1,090  | 1,100 | 1,110       | 1,120     | 1,130 | 1,140 | 1,150 | 1,160  | 1,170 |
|                    |           | AK      | PLMP         | XTMAFVXR | XXXXPXXSSA | PKXXLT | MAXX  | XXXXPKTGVPT | PKXXDXXXX | XXC   | TLWPH | MA    | XXXXXX | AS    |
| 1. Bradi1g06241.1  | VEPYGEA   |         | GH           | ITVCLV   | KRFV       | HGN    |       |             |           |       |       |       |        |       |
| 2. Bradi1g17780.1  | FLAL      | ESG     |              | K        | IAE        | ISAF   | VS    |             |           |       |       |       |        |       |
| 3. Bradi1g19713.1  | FSELADST  |         |              | KVI      | EDMR       | VFE    | ESN   |             |           |       |       |       |        |       |
| 4. Bradi1g19716.1  | ---       | LADSA   |              | RAI      | EMR        | AF     | ESN   |             |           |       |       |       |        |       |
| 5. Bradi1g19720.1  | FP        | ELDDAW  |              |          | KVL        | EDMK   | AF    | ESNR        |           |       |       |       |        |       |
| 6. Bradi1g19730.1  | FP        | AL      | ESA          |          |            | R      | LV    | EF          | TKAF      | VQD   |       |       |        |       |
| 7. Bradi1g19750.2  | FPEI      | DSG     |              |          | KLV        | EDVK   | AFI   | DRN         |           |       |       |       |        |       |
| 8. Bradi1g19760.1  | FPEI      | ADSG    |              |          | KFL        | EDLK   | VF    | QEH         |           |       |       |       |        |       |
| 9. Bradi1g21890.1  | FEEL      | ADSK    |              |          |            | RVL    | AEV   | AEF         | FN        | RA    |       |       |        |       |
| 10. Bradi1g38325.1 | FP        | KL      | ESAG         |          |            | EVV    | PKVR  | AE          | FI        | ETC   |       |       |        |       |
| 11. Bradi1g45921.1 | D         | K       | --LDSEE      |          |            | G      | V     | K           | L         | D     | SL    | MA    | FM     | KK*   |
| 12. Bradi1g45930.1 | MN        | --PRSEK |              |          |            | T      | V     | M           | O         | R     | L     | SL    | FL     | RK*   |
| 13. Bradi1g45945.1 | IN        | --PRSEK |              |          |            | A      | I     | K           | M         | O     | R     | V     | L      | R     |
| 14. Bradi1g45960.1 | LR        | --RWTEA |              |          |            | A      | A     | M           | L         | R     | V     | A     | E      | I     |
| 15. Bradi1g48173.1 | YS        | --PLRAT |              |          |            | S      | K     | K           | L         | M     | S     | T     | H      | E     |
| 16. Bradi1g48203.1 | YS        | --PLRAT |              |          |            | S      | K     | K           | L         | M     | S     | T     | H      | E     |
| 17. Bradi1g50705.1 | YN        | --PLRAT |              |          |            | S      | K     | K           | L         | M     | S     | T     | H      | E     |
| 18. Bradi1g56807.1 | V         | K       | PESEA        |          |            | A      | G     | E           | V         | V     | R     | L     | G      | R     |
| 19. Bradi1g56817.2 | ASDAS     |         |              |          |            | D      | G     | E           | V         | V     | R     | L     | L      | K     |
| 20. Bradi1g56830.1 | LDP       | PWNHA   |              |          |            | T      | G     | E           | L         | I     | R     | L     | V      | R     |
| 21. Bradi1g56860.1 | LDP       | PWNHA   |              |          |            | T      | G     | E           | L         | I     | R     | L     | V      | R     |
| 22. Bradi1g56870.1 | IDP       | WSDA    |              |          |            | S      | A     | E           | L         | M     | R     | A     | L      | K     |
| 23. Bradi1g56910.1 | V         | K       | PMSEA        |          |            | A      | G     | E           | V         | V     | R     | L     | G      | R     |
| 24. Bradi1g67600.1 | LHNYHLSQ  | PRT     |              |          |            | Q      | E     | M           | L         | A     | H     | I     | K      | A     |
| 25. Bradi1g67930.1 | LF        | KADR    | AA           |          |            |        | E     | V           | A         | Q     | V     | T     | D      | E     |
| 26. Bradi1g74240.1 | F         | K       | --EGCDD      |          |            | A      | V     | R           | E         | L     | A     | V     | V      | A     |
| 27. Bradi2g01817.1 | LR        | PFGVA   |              |          |            | A      | D     | E           | L         | M     | R     | V     | L      | R     |
| 28. Bradi2g25470.1 | N         | K       | FAVEMDPETGER |          |            | T      | Q     | I           | I         | D     | A     | S     | R      | F     |
| 29. Bradi2g25600.1 | LSNTDHYH  |         |              |          |            |        | E     | V           | M         | E     | I     | S     | D      | F     |
| 30. Bradi2g27300.1 | SR        | PFSDA   |              |          |            | A      | D     | E           | M         | M     | R     | L     | L      | R     |
| 31. Bradi2g57920.1 | LDVFLKTPQ |         |              |          |            | A      | Q     | A           | C         | A     | D     | I     | A      | I     |
| 32. Bradi3g21747.1 | L         | K       | PASAA        |          |            | A      | G     | E           | L         | V     | R     | L     | L      | A     |
| 33. Bradi3g38040.1 | H         | L       | L            | E        | CCDE       |        |       |             | A         | V     | A     | Q     | D      | K     |
| 34. Bradi3g38045.1 | H         | L       | L            | E        | GCDE       |        |       |             | A         | V     | V     | Q     | D      | K     |
| 35. Bradi3g38050.1 | Q         | E       | --ESAM       |          |            | A      | L     | A           | L         | M     | D     | R     | L      | V     |
| 36. Bradi3g38060.1 | NN        | --LESPK |              |          |            | A      | A     | M           | H         | M     | A     | T     | L      | A     |
| 37. Bradi3g38070.1 | EN        | S       | G            | ADK      |            |        | A     | Q           | K         | E     | L     | D     | A      | V     |
| 38. Bradi3g38080.1 | L         | K       | --PDGEK      |          |            | A      | A     | M           | E         | M     | A     | V     | A      | F     |
| 39. Bradi3g38090.2 | L         | K       | --PNGEK      |          |            | A      | A     | R           | E         | M     | T     | V     | A      | F     |
| 40. Bradi4g12370.1 | TR        | P       | F            | S        | P          | A      |       |             | A         | D     | D     | L     | L      | A     |
| 41. Bradi4g21690.1 | F         | P       | E            | F        | A          | E      | S     | R           |           |       |       |       |        |       |
| 42. Bradi4g21700.1 | F         | P       | E            | F        | S          | H      | A     | R           |           |       |       |       |        |       |
| 43. Bradi4g24773.1 | YS        | --PLRAT |              |          |            | S      | K     | K           | L         | M     | S     | T     | H      | E     |
| 44. Bradi4g32080.1 | DE        | --EGGSE |              |          |            | A      | A     | A           | L         | M     | R     | V     | M      | G     |
| 45. Bradi4g32080.2 | DE        | --EGGSE |              |          |            | A      | A     | A           | L         | M     | R     | V     | M      | G     |
| 46. Bradi4g32300.1 | E         | K       | --EGCEN      |          |            | A      | Q     | L           | M         | D     | R     | V     | A      | F     |
| 47. Bradi4g32310.1 | T         | K       | --LSTPQ      |          |            | A      | Q     | A           | E         | M     | A     | T     | L      | A     |
| 48. Bradi4g32320.1 | N         | K       | --DESGE      |          |            | S      | L     | A           | L         | M     | D     | R     | V      | A     |
| 49. Bradi4g32330.2 | F         | K       | --DCDD       |          |            | A      | V     | K           | E         | L     | A     | V     | V      | A     |
| 50. Bradi4g32340.1 | DA        | --EKNPK |              |          |            | S      | A     | K           | E         | L     | A     | F     | A      | G     |
| 51. Bradi4g32350.1 | HL        | G       | N            | F        | T          | C      | D     | D           |           |       | A     | V     | R      | Q     |
| 52. Bradi4g32360.1 | HL        | F       | C            | T        | S          | T      | Q     |             |           |       | T     | K     | A      | Q     |
| 53. Bradi4g39410.1 | LD        | G       | L            | L        | K          | T      | P     | E           |           |       | A     | Q     | A      | C     |
| 54. Bradi4g39410.2 | LD        | G       | L            | L        | K          | T      | P     | E           |           |       | A     | Q     | A      | C     |
| 55. Bradi3g42207.1 | L         | F       | V            | P        | E          | V      | A     | E           |           |       | E     | L     | F      | A     |
| 56. Bradi3g46450.1 | F         | K       | --DCEK       |          |            | A      | K     | D           | M         | I     | D     | R     | V      | A     |
| 57. Bradi3g46460.1 | F         | K       | --DCDK       |          |            | A      | K     | D           | M         | F     | H     | R     | V      | A     |
| 58. Bradi5g08900.1 | S         | K       | P            | W        | S          | E      | A     |             |           |       | S     | G     | E      | V     |
| 59. Bradi5g11800.1 | YE        | --PAEK  |              |          |            | A      | A     | E           | L         | L     | G     | K     | A      | E     |

Consensus

- 1. Bradi1g06241.1
- 2. Bradi1g17780.1
- 3. Bradi1g19713.1
- 4. Bradi1g19716.1
- 5. Bradi1g19720.1
- 6. Bradi1g19730.1
- 7. Bradi1g19750.2
- 8. Bradi1g19760.1
- 9. Bradi1g21890.1
- 10. Bradi1g38325.1
- 11. Bradi1g45921.1
- 12. Bradi1g45930.1
- 13. Bradi1g45945.1
- 14. Bradi1g45960.1
- 15. Bradi1g48173.1
- 16. Bradi1g48203.1
- 17. Bradi1g50705.1
- 18. Bradi1g56807.1
- 19. Bradi1g56817.2
- 20. Bradi1g56830.1
- 21. Bradi1g56860.1
- 22. Bradi1g56870.1
- 23. Bradi1g56910.1
- 24. Bradi1g67600.1
- 25. Bradi1g67930.1
- 26. Bradi1g74240.1
- 27. Bradi2g01817.1
- 28. Bradi2g25470.1
- 29. Bradi2g25600.1
- 30. Bradi2g27300.1
- 31. Bradi2g57920.1
- 32. Bradi3g21747.1
- 33. Bradi3g38040.1
- 34. Bradi3g38045.1
- 35. Bradi3g38050.1
- 36. Bradi3g38060.1
- 37. Bradi3g38070.1
- 38. Bradi3g38080.1
- 39. Bradi3g38090.2
- 40. Bradi4g12370.1
- 41. Bradi4g21690.1
- 42. Bradi4g21700.1
- 43. Bradi4g24773.1
- 44. Bradi4g32080.1
- 45. Bradi4g32080.2
- 46. Bradi4g32300.1
- 47. Bradi4g32310.1
- 48. Bradi4g32320.1
- 49. Bradi4g32330.2
- 50. Bradi4g32340.1
- 51. Bradi4g32350.1
- 52. Bradi4g32360.1
- 53. Bradi4g39410.1
- 54. Bradi4g39410.2
- 55. Bradi3g42207.1
- 56. Bradi3g46450.1
- 57. Bradi3g46460.1
- 58. Bradi5g08900.1
- 59. Bradi5g11800.1

1,180 1,190 1,195  
-----XXFTXXXXTGSXXXXXX\*

-----WCFTESWTCETCIQDKAI\*

-----VATPHEETGSPPY\*

RPGQTYMGSFSAAGHGS SVIKNFF\*
