# Supplementary figures and images for: Identification and Characterization of Carboxylesterases from Brachypodium distachyon Deacetylating Trichothecene Mycotoxins
Source: MDPI journal article supplement (doi:10.3390/toxins8010006), 2015-12-25

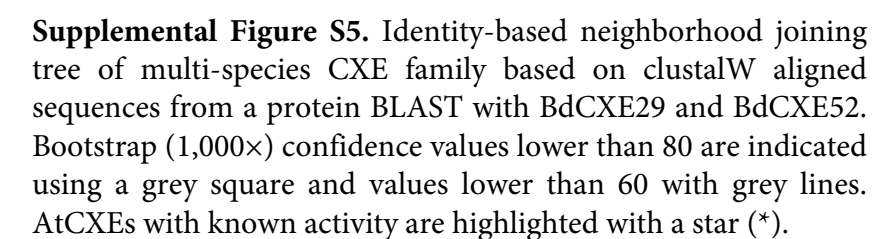

Supplement: s1 [file s1]
